# Supplementary material
Source: ML conference proceedings conference paper supplement (https://openreview.net/forum?id=GIBm-_kax6)
Supplement: supplementary_material [file attachment]

# EXPECTED IMPROVEMENT-BASED CONTEXTUAL BANDITS

**Anonymous authors**

Paper under double-blind review

## ABSTRACT

The expected improvement (EI) is a popular technique to handle the tradeoff between exploration and exploitation under uncertainty. However, compared to other techniques as Upper Confidence Bound (UCB) and Thompson Sampling (TS), the theoretical properties of EI have not been well studied even for non-contextual settings such as standard bandit and Bayesian optimization. In this paper, we introduce and study the EI technique as a new tool for the contextual bandits problem which is a generalization of the standard bandit. We propose two novel EI based algorithms for this problem, one when the reward function is assumed to be linear and the other when no assumption is made about the reward function other than it being bounded. With linear reward function, we demonstrate that our algorithm achieves a near-optimal regret. Further, when no assumptions are made about the form of reward, we use deep neural networks to model the reward function. We prove that this algorithm also achieves a near-optimal regret. Finally, we provide an empirical evaluation of the algorithms on both synthetic functions and various benchmark datasets. Our experiments show that our algorithms work well and consistently outperform existing approaches.

## 1 INTRODUCTION

The stochastic multi-armed bandit (Bubeck and Cesa-Bianchi, 2012; Lattimore and Szepesvári, 2020) has been extensively studied as an important model to optimize the trade-off between exploration and exploitation in sequential decision making. Among its many variants, the contextual bandit is widely used in real-world applications such as recommendation Li et al. (2010), advertising Graepel et al. (2010), robotic control Mahler et al. (2016), and healthcare Greenewald et al. (2017).

In each round of a contextual bandit, the agent observes a feature vector (the “context”) for each of the  $K$  arms, pulls one of them, and in return receives a scalar reward. The goal is to maximize the cumulative reward, or minimize regret (see our definition in Section 2), in a total of  $T$  rounds. To do so, the agent must find a trade-off between exploration and exploitation. Currently, there are two popular techniques to solve this trade-off. The first technique is called the optimism in face of uncertainty which chooses the optimal action by maximizing upper-confidence bounds (UCB), and the second one using Thompson Sampling (TS) whose basic idea is to estimate a posterior distribution on the reward, and sample an arm that maximises a random reward drawn from this distribution. A series of work has applied both UCB and TS or their variants to explore in contextual bandits with many forms of reward functions - linear and nonlinear. In the line of UCB, there are works of (Li et al., 2010; Chu et al., 2011; Abbasi-yadkori et al., 2011) for the linear bandits, works of (Filippi et al., 2010; Valko et al., 2013) for nonlinear contextual bandits, and very recently Zhou et al. (2020), which uses neural networks to learn the reward function. In the line of TS, Agrawal and Goyal (2013); Russo and Roy (2014) are for linear bandits, Russo and Roy (2014); Kveton et al. (2020) for generalized linear functions, and Riquelme et al. (2018); Zhang et al. (2021) for nonlinear bandits using deep neural networks.

Besides UCB and TS, the expected improvement (EI) (Moćkus, 1975) is one of the oldest and popular techniques to handle the tradeoff between exploration and exploitation under uncertainty. Different from UCB and TS, the EI is a greedy improvement-based heuristic that samples an action offering the greatest expected improvement over the incumbent. EI enjoys wide use due to its simplicity and ability to handle uncertainty in Bayesian optimization (Osborne, 2010; Zhan and Xing, 2020) - a

Table 1: The summary of the regret Bounds of the two popular algorithms in linear bandits.

| Algorithm                          | Regret Bound                                                        |
|------------------------------------|---------------------------------------------------------------------|
| Dani et al. (2008)                 | $\Omega(d\sqrt{T})$ ( <i>lower bound</i> )                          |
| OFUL (Abbasi-yadkori et al., 2011) | $\mathcal{O}(d\ln(T)\sqrt{T} + \sqrt{dT\ln(T/\delta)})$             |
| LinTS (Agrawal and Goyal, 2013)    | $\mathcal{O}(d^{3/2}\sqrt{T}(\ln(T) + \sqrt{\ln(T)\ln(1/\delta)}))$ |
| Our LinEI                          | $\mathcal{O}(d\sqrt{T\ln^2(T)\ln\frac{T}{\delta}})$                 |

problem that is closely related to infinite-arm multi-arm bandits. There are also several papers Ryzhov (2016); Qin et al. (2017) using EI to study the best-arm identification problem (also known as “pure exploration”) which is a finite variant of Bayesian optimization. However, for a contextual bandit which is a generalization of the standard bandit due to its reward depending on both the actions and contexts, it is yet to be seen whether EI can handle the trade-off between exploration and exploitation well. In fact, to our best knowledge, there are no EI-based algorithms even for the standard bandits in the setting of exploration and exploitation.

A key challenge of analyzing EI-based algorithms comes from its improvement function involving nonlinear, nonconvex term unlike UCB and TS. This causes the difficulty of the analysis of EI. Another challenge comes from the fact that this improvement function is mainly designed to reduce uncertainty, and thus, solely focusing on exploration. These reasons together explains why theoretical analyses of EI based methods is limited, compared to that of UCB and TS. Furthermore, these few notable exceptions typically focus on bounding the simple regret in EI based Bayesian optimisation (Bull, 2011) and best-arm identification (Ryzhov, 2016; Qin et al., 2017). To our best knowledge, none of the existing work has investigated the cumulative regret of EI in the proper bandit setting yet.

Against this background, our work proposes the first theoretical analysis of EI based methods in the classical bandit setting. In particular, we consider contextual bandits and are interested in deriving bounds on cumulative regret for our algorithms which is more suitable for contextual bandits. We note that cumulative regret bounds are stronger than the simple regret bounds and are usually more challenging to establish. In summary, our main contributions in this paper are:

- We introduce and formalize Expected Improvement as a new strategy for contextual bandits creating a parallel to UCB and TS.
- We propose two EI-based algorithms. The first algorithm (LinEI) assumes the reward function to be linear whilst the second algorithm (NeuralEI) is designed for the case when no assumption can be made about the reward function other than boundedness and we model it by a deep neural network.
- For the linear reward function, our LinEI algorithm is able to achieve  $\mathcal{O}(d\sqrt{T\ln^2(T)\ln\frac{T}{\delta}})$  regret which matches the information theoretic lower bound  $\Omega(d\sqrt{T})$  for this problem (up to  $\ln(T)$ ). For the general reward function, we prove that, under standard assumptions (see section 4.1), our NeuralEI algorithm is able to achieve  $\tilde{\mathcal{O}}(\tilde{d}\sqrt{T})$  regret, where  $\tilde{d}$  is the “effective” dimension of a neural tangent kernel matrix and  $T$  is the number of rounds.
- Finally, we provide an empirical evaluation of the algorithms on both synthetic functions and various benchmark datasets. Our experiments show that LinEI outperforms other baselines for linear bandits, and when the reward function is non-linear, NeuralEI outperforms all baselines.

## 2 PROBLEM SETTING

We consider the problem of  $K$ -arm contextual bandits. At time  $t = 1, 2, \dots$ , the agent observes  $K$  contextual vectors  $x_{i,t} \in \mathbb{R}^d$ , then selects an arm  $a(t)$  and receives a reward  $r_{a(t),t}$  which has a general form as follows:

$$r_{a(t),t} = h(x_{a(t),t}) + \xi_{a(t),t},$$

where  $h$  is an unknown reward function satisfying  $0 \leq h(x) \leq 1$  for any  $x \in \mathbb{R}^d$ , and  $\xi_{a(t),t}$  is conditionally  $R$ -subGaussian for a constant  $R \geq 0$ , i.e.,  $\forall \lambda \in \mathbb{R}, \mathbb{E}[e^{\lambda \xi_{a(t),t}} | \{x_{i,t}\}_{i=1}^K] \leq \exp(\frac{\lambda^2 R^2}{2})$ . In our setting, we assume that these context vectors may be chosen by an adversary in an adaptive manner after observing the arms played and their rewards up to time  $t - 1$ . For the unknown function  $h$ , we consider two cases as follows:

- the reward function  $h$  is linear, i.e.,  $h(x_{t,i}) = x_{t,i}^T \theta^*$ , where  $\theta^* \in \mathbb{R}^d$  are fixed but unknown parameters. Without loss of generality, we here assume that  $\|x_{i,t}\| \leq 1, \|\theta^*\| \leq 1$ .
- the reward function  $h$  is modelled by a fully connected neural network with depth  $L \geq 2$  defined recursively by

$$f(x; \theta) = \sqrt{m} W_L \sigma(W_{L-1} \sigma(\dots \sigma(W_1 x))),$$

where  $\sigma(x) := \max\{x, 0\}$  is the ReLU activation,  $\theta = (\text{vec}(W_1); \dots; \text{vec}(W_L)) \in \mathbb{R}^p$  is the collection of parameters of the neural network,  $p = dm + m^2(L - 2) + m$ . Without loss of generality, we assume that the width of each hidden layer is the same (i.e.,  $m$ ) for convenience in analysis. We denote the gradient of the neural network function by  $g(x; \theta) = \nabla_{\theta} f(x; \theta) \in \mathbb{R}^p$ .

**Performance Measure.** Let  $a^*(t)$  denote the optimal arm at time  $t$ . The objective is to minimize the cumulative regret  $R(T) = \sum_{t=1}^T (x_{a^*(t),t}^T \theta^* - x_{a(t),t}^T \theta^*)$ .

### 3 THE LINEI ALGORITHM FOR LINEAR BANDITS

**Prior and Posterior Distributions.** We follow the design for priors of the reward function like TS algorithm (Agrawal and Goyal, 2013). We assume that the likelihood of reward  $r_{i,t}$  of each arm  $i$  follows a Gaussian distribution  $\mathcal{N}(x_{i,t}^T \theta^*, v^2)$ , where the variance  $v^2$  will be specified later. Let  $X(t) = \lambda I + \sum_{j=1}^{t-1} x_{a(j),j} x_{a(j),j}^T$ ,  $\hat{\theta}_t = X(t)^{-1} (\sum_{j=1}^{t-1} x_{a(j),j} r_{a(j),j})$ . Then if we assume that the prior for  $\theta^*$  at time  $t$  is given by  $\mathcal{N}(\hat{\theta}_t, v^2 X^2(t))$ , then the posterior distribution of  $\theta^*$  at time  $t + 1$  is  $\mathcal{N}(\hat{\theta}_{t+1}, v^2 X^2(t + 1))$  (see the proof in Appendix A.1 in (Agrawal and Goyal, 2013)).

**Expected Improvement for Linear Contextual Bandits.** We now use this posterior distribution update to define the form of the expected improvement of each arm in contextual bandits. We denote  $r_t^+ = \max_{i \in \mathcal{K}} \{x_{i,t}^T \hat{\theta}_t\}$  which is the largest mean estimate of reward among all arms at time  $t$ . We define the expected improvement of an arm  $i$  at time  $t$  as

$$\alpha_{i,t}^{EI} = \mathbb{E}_{\mu \sim \mathcal{N}(\hat{\theta}_t, v^2 X(t)^{-1})} [\max\{0, x_{i,t}^T \mu - r_t^+\}], \quad (1)$$

The  $\alpha_{i,t}^{EI}$  measures the potential of arm  $i$  to improve upon the largest posterior reward mean at time  $t$ . We note that in Eq(1),  $r_t^+$  plays a role as an incumbent. In Bayesian optimization, the incumbent is usually selected as the best reward value so far, or the largest reward mean so far. In our setting with contextual bandits, we choose the latter for convenient in analysis.

Further, we define  $s_{i,t} = \sqrt{x_{i,t}^T X(t)^{-1} x_{i,t}}$ . We see that if  $\mu \sim \mathcal{N}(\hat{\theta}_t, v^2 X(t)^{-1})$  then the marginal distribution of  $x_{i,t}^T \mu$  is Gaussian with mean  $x_{i,t}^T \hat{\theta}_t$  and standard deviation  $vs_{i,t}$ . Thus, we can express the expected improvement in closed form as follows

$$\alpha_{i,t}^{EI} = (x_{i,t}^T \hat{\theta}_t - r_t^+) \Phi\left(\frac{x_{i,t}^T \hat{\theta}_t - r_t^+}{vs_{i,t}}\right) + vs_{i,t} \phi\left(\frac{x_{i,t}^T \hat{\theta}_t - r_t^+}{vs_{i,t}}\right), \quad (2)$$

where  $\Phi(\cdot)$  and  $\phi(\cdot)$  are the standard normal cdf and pdf function of the normal distribution respectively.

**LinEI Algorithm.** We use this expected improvement to design our algorithm. We consider two particular arms among all arms: the arm selected by the EI mechanism, denoted by  $\bar{a}(t)$ . Formally,  $\bar{a}(t) = \arg\max_{i \in [K]} \alpha_{i,t}^{EI}$ ; and the best-so-far arm, denoted by  $\hat{a}(t)$ . Formally,  $\hat{a}(t) = \arg\max_{i \in [K]} \{x_{i,t}^T \hat{\theta}_t\}$ .

**Algorithm 1** The Linear Expected Improvement Algorithm (LinEI)**Input:** parameters  $C_0, \beta$ 


---

```

1: for  $t = 1$  to  $T$  do
2:   Observe contexts  $\{x_{i,t}\}_{i=1}^K$ 
3:   Set  $\bar{a}(t) := \operatorname{argmax}_{i \in \mathcal{K}} \alpha_{i,t}^{EI}$ ,  $\tilde{a}(t) = \operatorname{argmax}_{i \in \mathcal{K}} \{x_{i,t}^\top \hat{\theta}_t\}$ 
4:   if  $\alpha_{\bar{a}(t),t}^{EI} \geq \frac{C_0}{t^\beta}$  then
5:      $a(t) = \bar{a}(t)$ 
6:   else
7:      $a(t) = \tilde{a}(t)$ 
8:   end if
9:   Play arm  $a(t)$ , and observe reward  $r_{a(t),t}$ 
10:  Update  $X(t+1) = \lambda I_d + \sum_{j=1}^t x_{a(j),j} x_{a(j),j}^\top$ ,  $\hat{\theta}_{t+1} = X(t+1)^{-1} (\sum_{j=1}^t x_{a(j),j} r_{a(j),j})$ 
11: end for

```

---

Selecting arm  $\bar{a}(t)$  by the EI strategy yields potentially the highest expected improvement over  $\max_{i \in [K]} \{x_{i,t}^\top \hat{\theta}_t\}$ . However, when the expected improvement (measured by  $\alpha_{i,t}^{EI}$  of all arms) is small, an empirical observation is that the exploitation using  $\tilde{a}(t)$  is often better than the solution  $\bar{a}(t)$ . To make use of this intuition, we propose a modification in the EI algorithm by introducing a threshold function  $g(t)$ . If  $\max_{i \in [K]} \alpha_{i,t}^{EI} \geq g(t)$  then the algorithm selects  $\bar{a}(t)$ , otherwise selects  $\tilde{a}(t)$  for the pure exploitation. We consider  $g(t) = \frac{C_0}{t^\beta}$  which is controlled by two parameters  $C_0, \beta$ . Our algorithm is summarized in Algorithm 1. The threshold function is a crucial factor in achieving our optimal convergence rate for our algorithm and a relevant choice of parameters of the threshold function is discussed in the next section.

**Comparison with several related works.** Our LinEI is related to the  $\epsilon$ -Greedy strategy. The  $\epsilon$ -Greedy strategy in the standard bandit plays the best arm based on current estimates with probability  $1 - \epsilon$  and otherwise explores uniformly at random. The  $\epsilon$ -Greedy EI algorithm in Bayesian optimization (Bull, 2011)) plays the arm with the highest EI with probability  $1 - \epsilon$  and otherwise explores uniformly at random. Unlike these algorithms, our algorithm removes the exploration at random, and uses a time-varying threshold function for arm-selection instead of a coin flip. Our algorithm is also different from the TTEI algorithm (Qin et al., 2017) for the best arm identification in a non-contextual setting. TTEI algorithm is designed to allocate a sufficient number of samples to the suboptimal arms to eliminate these arms with high confidence. While this is appropriate to solve BAI but it can not be used for contextual bandit problems. This is because it is not possible to eliminate an arm completely as in contextual bandits, this arm could be the best arm in some context. See Section C in our Supplementary Material for more discussion.

### 3.1 THEORETICAL ANALYSIS

In this section, we provide the regret bound for the proposed LinEI algorithm. There are the two main challenges in our theoretical analysis. The first one is to extend several original techniques of (Bull, 2011) in Bayesian optimization which is non-contextual and noise-free setting to our setting with contexts and noisy. Different from the work of (Bull, 2011) where the reward is assumed to be in a RKHS space with a Matérn kernel, our setting assumes that the reward is a linear function of contexts and an unknown parameter  $\theta^*$ . The second challenge is that the EI strategy is suitable for BAI problem whose goal is to seek the arm with the best reward rather for contextual bandits which the concept “best arm” does not make sense. Solving these challenges is non-trivial. See our discussion in section C in the Supplementary Material. We achieve an upper bound for the instantaneous regret  $r_t = x_{a^*(t),t}^\top \theta^* - x_{a(t),t}^\top \theta^*$  as in Lemma 9 in our Supplementary Material:

$$r_t \leq \left[ \frac{\tau(\frac{\beta_t}{v_t})}{\tau(-\frac{\beta_t}{v_t})} (2\beta_t + v_t) + \left( \sqrt{2\ln(Rt^\beta)} + 6\sqrt{C_0^{-2} d \ln(\frac{t+1}{\delta})} + 1 \right) v_t \right] s_{a(t),t} + \frac{\tau(\frac{\beta_t}{v_t})}{\tau(-\frac{\beta_t}{v_t})} \frac{C_0}{t^\beta},$$

**Algorithm 2** Neural Expected Improvement Algorithm (NeuralEI)

**Input:** Number of rounds  $T$ , exploration variance  $\nu$ , network width  $m$ , regularization parameter  $\lambda$  and parameters  $C_0, \beta$

```

1: Set  $U_0 = \lambda I$ 
2: for  $t = 1$  to  $T$  do
3:   Set  $\bar{a}(t) := \operatorname{argmax}_{i \in [K]} \alpha_{i,t}^{EI}$ ,  $\tilde{a}(t) = \operatorname{argmax}_{i \in [K]} \{f(x_{i,t}; \theta_{t-1})\}$ 
4:   if  $\alpha_{\bar{a}(t),t}^{EI} \geq \frac{C_0}{t^\beta}$  then
5:      $a(t) = \bar{a}(t)$ 
6:   else
7:      $a(t) = \tilde{a}(t)$ 
8:   end if
9:   Play arm  $a(t)$ , and observe reward  $r_{a(t),t}$ 
10:  Set  $\theta_t$  to be the output of gradient descent for solving Eq(3)
11:   $U_t = U_{t-1} + g(x_{a(t),t}; \theta_t)g^\top(x_{a(t),t}; \theta_t)/m$ 
12: end for

```

with probability at least  $1 - \delta$ , where  $v_t = R\sqrt{9d\ln\frac{t+1}{\delta}}$ ,  $\beta_t = R\sqrt{d\ln(\frac{t^3}{\delta})} + 1$ ,  $s_{i,t} = \sqrt{x_{i,t}^\top X(t)^{-1}x_{i,t}}$  and the function  $\tau$  is defined as  $\tau(z) = z\Phi(z) + \phi(z)$ . Here, we note that parameter  $v_t$  plays the role of parameter  $v$  at time  $t$  we discussed above. In our analysis,  $v_t$  is used to eliminate the influence of  $\beta_t$  so that  $\frac{\beta_t}{v_t}$  is bounded as  $t$  grows.

Finally, we achieve the following regret bound for our proposed algorithm with a completed proof as well as the relevant choice of parameters in Supplementary Material.

**Theorem 1.** *Given any  $\delta \in (0, 1)$ . If  $v_t = R\sqrt{9d\ln\frac{t+1}{\delta}}$ ,  $\sqrt{d} \leq C_0 \leq d$  and  $0.5 \leq \beta \leq 3$  then with probability  $1 - \delta$ , the cumulative regret of the LinEI algorithm is bounded as*

$$R(T) = \mathcal{O}(d\sqrt{T\ln^2(T)\ln\frac{T}{\delta}}).$$

#### 4 THE NEURALEI ALGORITHM FOR NEURAL CONTEXTUAL BANDITS

In this section, we extend our Algorithm 1 when the reward function is modelled by a fully connected neural network. Similar to the Neural Thompson Sampling approach (Zhang et al., 2021), our algorithm maintains a Gaussian distribution for each arm's reward. At time  $t$ , the posterior distribution of the reward of arm  $i$  is updated as follows. The mean is set to the output of the neural network, denoted by  $f(x_{i,t}; \theta_{t-1})$ , and the variance is defined as  $\sigma_{i,t}^2 = \lambda g^\top(x_{i,t}; \theta_{t-1})U_{t-1}^{-1}g(x_{i,t}; \theta_{t-1})/m$ , where the matrix  $U_t^{-1}$  is updated as  $U_t = U_{t-1} + g(x_{a(t),t}; \theta_t)g^\top(x_{a(t),t}; \theta_t)/m$  and parameter  $\theta_t$  is the solution to the following minimization problem:

$$\min_{\theta} L(\theta) = \sum_{i=1}^t [f(x_{a(i),i}; \theta) - r_{a(i),i}]^2/2 + m\lambda\|\theta - \theta_0\|_2^2/2, \quad (3)$$

where  $\theta_0$  is randomly initialized network parameter. We can adapt gradient descent algorithms to solve this problem with step size  $\eta$  and total number of iterations  $J$  like the gradient descent algorithm of (Zhou et al., 2020).

**Expected Improvement for Neural Contextual Bandits.** We now define the form of the expected improvement in this setting. At each time step  $t$ , we denote  $f_t^+ = \max_{i \in [K]} \{f(x_{i,t}; \theta_{t-1})\}$  which is the highest mean estimate of  $f(x, \theta_{t-1})$  among all arms at time  $t$ . We define the expected improvement value of an arm  $i$  at time  $t$  as

$$\alpha_{i,t}^{EI} = \mathbb{E}_{\tilde{f}_{i,k} \sim \mathcal{N}(f(x_{i,t}; \theta_{t-1}), \nu^2 \sigma_{i,t}^2)} [\max\{0, \tilde{f}_{i,k} - f_t^+\}].$$

Further, the above expectation can be computed analytically as follows

$$\alpha_{i,t}^{EI} = (f(x_{i,t}; \theta_{t-1}) - f_t^+) \Phi\left(\frac{f(x_{i,t}; \theta_{t-1}) - f_t^+}{\nu \sigma_{i,t}}\right) + \nu \sigma_{i,t} \phi\left(\frac{f(x_{i,t}; \theta_{t-1}) - f_t^+}{\nu \sigma_{i,t}}\right) \quad (4)$$

Our NeuralEI algorithm is given in Algorithm 2. It starts by initializing  $\theta_0 = (\text{vec}(W_1); \dots; \text{vec}(W_L))$ , where for each  $1 \leq l \leq L-1$ ,  $W_l = (W, 0; 0, W)$ , each entry of  $W$  is generated independently from  $N(0, 4/m)$ ;  $W_L = (w^\top, -w^\top)$ , each entry of  $w$  is generated independently from  $N(0, 2/m)$ . NeuralEI extends our LinEI algorithm to the setting where the reward function  $h$  is modelled by a fully connected neural network.

#### 4.1 REGRET ANALYSIS

In this section, we provide a regret analysis of the NeuralEI algorithm. We first provide necessary background on the neural tangent kernel (NTK) theory, which plays an important role in our analysis. Following a recent line of research (Zhou et al., 2020; Zhang et al., 2021), we define the covariance between two data point  $x, y \in \mathbb{R}^d$  as follows:  $\tilde{H}^{(1)}(x, y) = \sigma^{(1)}(x, y) = x^\top y$ ,  $A^{(l)}(x, y) = \begin{pmatrix} \sigma^{(l)}(x, x) & \sigma^{(l)}(x, y) \\ \sigma^{(l)}(x, y) & \sigma^{(l)}(y, y) \end{pmatrix}$ ,  $\sigma^{l+1}(x, y) = 2\mathbb{E}_{(u,v) \sim N(0, A^{(l)}(x,y))}[\sigma(u)\sigma(v)]$ ,  $\tilde{H}^{(l+1)}(x, y) = 2\tilde{H}^{(l)}(x, y)\mathbb{E}_{(u,v) \sim N(0, A^{(l)}(x,y))}[\sigma'(u)\sigma'(v)] + \sigma^{(l+1)}(x, y)$ . Similar to (Zhou et al., 2020; Zhang et al., 2021), we assume that the number of rounds  $T$  is *known* and denote the neural tangent kernel (NTK) matrix  $H \in \mathbb{R}^{TK \times TK}$  based on all contextual vectors  $\{x_{t,k}\}_{t \in [T], k \in [K]}$ . Renumbering  $\{x_{t,k}\}_{t \in [T], k \in [K]}$  as  $\{x_i\}_{i=1, \dots, TK}$ , then each entry  $H_{ij}$  is defined as

$$H_{ij} = (\tilde{H}^{(L)}(x_i, x_j) + \sigma^{(L)}(x_i, x_j))/2, \quad (5)$$

for all  $i, j \in [TK]$ . Based on the above definition, we impose the following assumption on the contexts generated by the adversary and the corresponding NTK matrix  $H$ .

**Assumption 1.** *Let  $H$  be defined in Eq(5). There exists  $\lambda_0 > 0$  such that  $H \geq \lambda_0 I$ . In addition, for any  $t \in [T]$ ,  $k \in [K]$ ,  $\|x_{t,k}\|_2 = 1$  and  $[x_{t,k}]_j = [x_{t,k}]_{j+d/2}$ .*

**Remark 1.** Compared to Algorithm 1 for linear bandits, our Algorithm 2 needs an additional Assumption 1 to guarantee the convergence. The assumption that the NTK matrix is positive definite has been considered in prior work on NTK which is a mild condition and also imposed in other related works (Arora et al., 2019; Du et al., 2019; Zhou et al., 2020; Zhang et al., 2021). The assumption on contexts ensures that  $f(x_{i,t}; \theta_0) = 0$  for any  $i \in [K]$ ,  $t \in [T]$ .

The NTK technique builds a connection between deep neural networks and kernel methods. It enables us to adapt some complexity measures for kernel methods to describe the complexity of the neural network through the notation of the effective dimensions as defined in (Zhou et al., 2020; Zhang et al., 2021). The effective dimension  $\tilde{d}$  of matrix  $H$  with regularization parameter  $\lambda$  is defined as  $\tilde{d} = \frac{\log \det(I+H/\lambda)}{\log(1+TK/\lambda)}$ .

Using these notations, we are now ready to present the second main result of the paper. Let  $a^*(t) = \arg\max_{i \in [K]} \mathbb{E}[r_{i,t}]$  be the optimal action at round  $t$  that maximizes the expected reward, we define the *expected cumulative regret* after  $T$  iterations as  $\bar{R}(T) = \mathbb{E}[\sum_{t=1}^T (r_{a^*(t),t} - r_{a(t),t})]$ . Then, we achieve the following upper regret bound for our Algorithm 2 by combining our EI techniques for LinEI with NTK techniques. A completed proof is provided in Supplementary Material.

**Theorem 2.** *Under Assumption 1, set the parameters in Algorithm 2 as  $\lambda = 1 + 1/T$ ,  $\nu = B + R\sqrt{\tilde{d}\log(1+TK/\lambda) + 2 + 2\log(1/\delta)}$ , where  $B = \max\{1, \sqrt{2h^\top H^{-1}h}\}$  with  $h = (h(x_1), \dots, h(x_{TK}))^\top$ . If  $\sqrt{\tilde{d}} \leq C_0 \leq \tilde{d}$ ,  $\beta \geq 2$ , and the network width  $m$  satisfies  $m \geq \text{poly}(\gamma, T, K, L, \log(1/\delta))$ , then with probability at least  $1 - \delta$ , the regret of Algorithm 2 is bounded as*

$$\bar{R}(T) \leq \mathcal{O}(\tilde{d}\sqrt{\beta\log(1+TK)\log(T)T}).$$

**Remark 2.** The regret bound depends on the parameter  $\beta$ . The best choice is  $\beta = 2$  that tightens the regret. Theorem 2 implies the regret of NeuralEI is on the order of  $\tilde{\mathcal{O}}(\tilde{d}\sqrt{T})$ . Similar to previous results (Zhou et al., 2020; Zhang et al., 2021), our results require a large value of  $m$ . This is rooted in the current deep learning theory based on the neural tangent kernel.

## 5 RELATED WORKS AND DISCUSSION

Given the vast literature on bandit algorithms, we restrict our review to linear bandits and neural contextual bandits.

**Linear Contextual Bandit.** A lower bound of  $\Omega(d\sqrt{T})$  for linear bandits was given by Dani et al. (2008), when the number of arms is allowed to be infinite. (Abbasi-yadkori et al., 2011) analyze a UCB-style algorithm and provide a regret upper bound  $\mathcal{O}(d\log(T)\sqrt{T} + \sqrt{dT\log(T/\delta)})$ . When the number of arms  $K$  is finite, (Chu et al., 2011) achieve a regret bound of  $\mathcal{O}(\sqrt{Td\ln^3(KT\ln T)/\delta})$  with probability at least  $1 - \delta$ . (Bubeck et al., 2012) provides an algorithm based on exponential weights, with regret of order  $\mathcal{O}(d\sqrt{T\log K})$ . These algorithms may not be effective when the number of arms  $K$  is large. For example, when  $K$  is exponential in  $d$ , the regret bound of (Chu et al., 2011) would become  $\mathcal{O}(d^2\sqrt{T})$  showing a quadratic growth in  $d$ . We note that although our algorithm is a Bayesian approach, our regret bounds will hold irrespective of whether or not the actual reward distribution matches the Gaussian likelihood function. Thus, our bounds for EI algorithm are directly comparable to the UCB family of algorithms. This is also mentioned in Agrawal and Goyal (2013).

The Thompson Sampling algorithm (Agrawal and Goyal, 2013) and an alternative given by Abeille and Lazaric (2017) often bear an additional  $\sqrt{d}$  in the regret bound compared to UCB based bounds. See our Table 1. Very recently, Kim et al. (2021) improved this regret bound of TS by integrating a doubly robust estimator with TS. However, this work requires additional significant computations and their setting is restrictive in the sense that contexts need to be independent. Our EI-based algorithm achieves the same regret bound order as in Kim et al. (2021), however, it caters to a more general setting where the contexts may be controlled by an adaptive adversary and therefore may not be independent.

Another approach for linear bandits is the Information Directed Sampling (IDS) which was introduced by Russo and Van Roy (2014). It provides an action-selection mechanism by minimizing the information ratio between the squared expected regret and the mutual information between optimal action and the next observation over all action sampling distributions. IDS obtains a performance improvement over TS and UCB algorithms in some cases, but has heavy sampling requirements. It has been shown in their experiments that IDS requires significantly more compute time than Thompson sampling and UCB algorithms. Recently, (Baek and Farias, 2021) provided a modification of the arm scoring rule of IDS to reduce computations. However, both Russo and Van Roy (2014) and (Baek and Farias, 2021) only provide the bounds on *expected regret*. In contrast, our work provides regret bounds in terms of cumulative regret which is tighter than expected regret.

**Neural Contextual Bandit.** Neural contextual bandits are becoming attractive due to the current advancement in optimization and generalization of deep neural networks (Arora et al., 2019; Du et al., 2019). While Neural contextual bandits have been considered in both popular techniques UCB (Zhou et al., 2020) and TS (Zhang et al., 2021), we consider this problem in a new setting using the EI technique. A recent work of Xu et al. (2020) combines the deep learning and the representation learning to improve the computational efficiency of the previous works, however, it considers a weaker version of the general reward function that is a linear function of deep network based extracted features.

Due to the space limitation, we added more discussion on related works in Section B in the Supplementary Material.

## 6 EXPERIMENTS

### 6.1 LINEAR BANDITS

In this subsection, we assess the performance of our LinEI algorithm on several benchmark dataset including `covertime`, `magic`, `avila`, `dry bean`, `statlog`, `letter`, `pendigits`, all from UCI (Dua and Graff, 2017). We compare the LinEI with methods designed for linear bandits including: LinTS (Agrawal and Goyal, 2013), LinUCB (Abbasi-yadkori et al., 2011), Linear Epsilon Greedy for the linear reward, LinIDS Russo and Van Roy (2014) for linear bandits. To transform these classification problems into multi-armed bandits, we adapt the disjoint models to build a context

Table 2: Characteristics of benchmark datasets used in Section 5.2.

| Dataset           | letter | pendigits | covertypes | avila | magic | dry bean | statlog |
|-------------------|--------|-----------|------------|-------|-------|----------|---------|
| Classes ( $K$ )   | 26     | 10        | 7          | 12    | 2     | 7        | 7       |
| Feature Dimension | 17     | 16        | 54         | 10    | 10    | 16       | 8       |
| Dataset size      | 20000  | 10992     | 581012     | 20867 | 19020 | 13611    | 58000   |

feature vector for each arm: given an input feature  $x \in \mathbb{R}^d$  of a  $k$ -class classification problem, we build the context feature vector with dimension  $kd$  as  $x_1 = (x; 0; \dots; 0)$ ,  $x_2 = (0; x; \dots; 0)$ , ...,  $x_k = (0; 0; \dots; x)$ . The algorithm generates a set of predicted reward and pulls the greedy arm. For these classification problems, if the algorithm selects a correct class by pulling the corresponding arm, it will receive a reward as 1, otherwise 0. The cumulative regret over time horizon  $T$  is measured by the total mistakes made by the algorithm.

We set the time horizon of our algorithm to 10000 for all data sets. In the experiments, we shuffle all datasets randomly. For  $(\lambda, \nu)$  used in LinUCB and LinTS and our algorithm, we set  $\lambda = 1$  following previous works and do a grid search of  $\nu \in \{1, 0.1, 0.01\}$  to select the parameter with the best performance. All experiments are repeated 10 times, and the average with standard error are reported. For LinIDS, we use the number of samples  $M = 100$ . For Linear Epsilon Greedy, we use  $\epsilon = 0.1$ . For our LinEI algorithm, we can choose any value  $C_0 \in [\sqrt{d}, d]$  and  $\beta \in [0.5, 3]$ . For LinEI, we set  $C_0 = \sqrt{d}$  and  $\beta = 2$ .

Figure 1 shows the total regret of all algorithms for datasets bean, covertypes and statlog. The Linear Epsilon Greedy performs the worst. This implies that the random exploration is not as effective as other methods. While LinUCB, LinTS and LinIDS are competitive, all these methods are significantly outperformed by the proposed algorithm. The arm-selection of our LinEI bases on two strategies: expected improvement and greedy strategy. Compared to Linear Epsilon Greedy, our greedy strategy is similar. It confirms that the exploration of the expected improvement is effective. This suggests that using the expected improvement strategy is efficient in linear bandits. Due to space limit, the additional results on magic, pendigits, letter, and avila are shown in Section A of Supplementary Material.

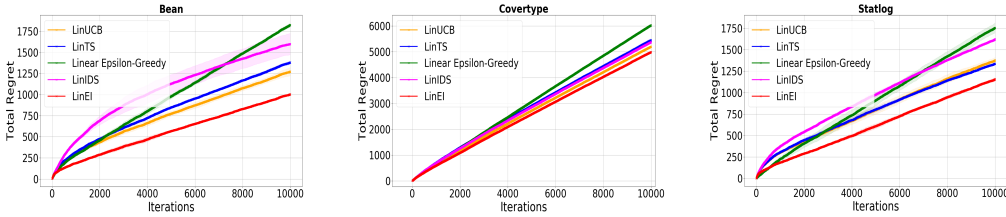

Figure 1: Comparison of our proposed LinEI and baseline algorithms in linear bandits.

## 6.2 NEURAL BANDITS

We compare the proposed NeuralEI with baselines including: LinUCB (Abbasi-yadkori et al., 2011), our LinEI for linear bandits problem, Neural Epsilon Greedy, NeuralUCB (Zhou et al., 2020), NeuralTS (Zhang et al., 2021). We do the same classification problems as the experiments in subsection Linear Bandits. For methods using the neural network, we use one-hidden layer neural networks with 100 neurons to model the reward function. During posterior updating, gradient descent is run for 100 iterations with learning rate 0.001. For Neural UCB/Thompson Sampling and Neural EI, we use a grid search on  $\lambda \in \{1, 10^1, 10^{-2}, 10^{-3}\}$  and  $\nu \in \{10^{-1}, 10^{-2}, 10^{-3}, 10^{-4}, 10^{-5}\}$ . We consider our algorithm on both synthetic datasets and real-world datasets.

**Synthetic Datasets.** In these experiments, we use contextual bandits, we use contextual bandits with dimension  $d = 10$  and  $K = 5$  actions. The context vectors  $\{x_{1,1}, \dots, x_{T,K}\}$  are chosen



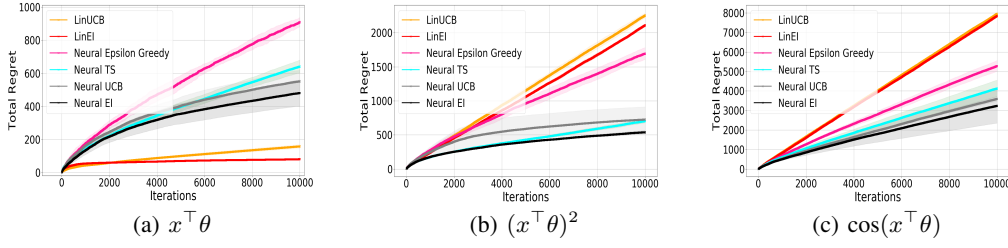

Figure 2: Comparison of NeuralEI and baseline algorithms on synthetic reward functions.

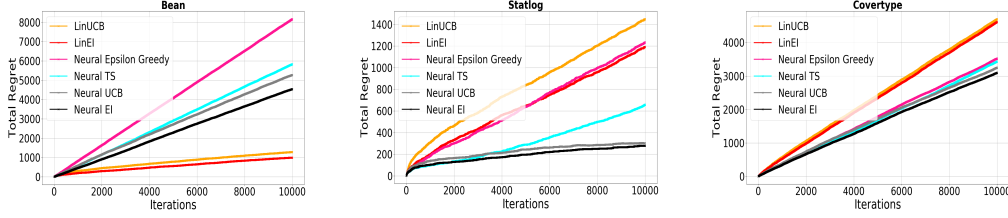

Figure 3: Comparison of NeuralEI and baseline algorithms on real-world datasets.

uniformly at random from the unit ball. The reward function  $r$  is one of the following synthetic functions  $r_1(x) = (x^\top \theta)^2$ ,  $r_2(x) = (x^\top \theta)^2$ , and  $r_3(x) = \cos(3x^\top \theta)$ .

**Real-world Datasets.** Similar to the subsection Linear Bandit, we build the context feature vector with dimension  $kd$  as  $x_1 = (x; 0; \dots; 0)$ ,  $x_2 = (0; x; \dots; 0)$ , ...,  $x_k = (0; 0; \dots; x)$ . We also estimate our algorithm on datasets `bean`, `covertype` and `statlog`.

Figures 2 and 3 show our results in the case of the neural bandits problem. In Figure 2, if the reward function is linear, the LinEI outperforms all other neural-based methods because it is designed for the linear bandits. Otherwise, if reward functions are non-linear, LinEI and LinUCB fail to learn them for nearly all tasks due to the nonlinearity of reward functions  $h$ . Neural-based methods perform better because they can capture the nonlinearity of the underlying reward function. In real-datasets, while neural-based methods outperform LinEI and LinUCB for datasets `covertype` and `statlog`, these methods are not sample-efficient for learning the reward function of dataset `bean`. Perhaps, the reward function for dataset `bean` is linear. However, in all cases, our NeuralEI algorithm performs better than other neural-based methods. This suggests that using the expected improvement strategy is effective in both linear bandits and neural contextual bandits.

## 7 CONCLUSION

We introduced and formalized Expected Improvement as a new strategy for contextual bandits. We proposed two EI-based algorithms and analyzed them theoretically. The first algorithm assumes the reward function to be linear whilst the second algorithm is designed for the case when the reward function is general and can be modelled by a deep neural network. In particular, our LinEI algorithm for linear bandits achieves a near-optimal regret bound and improves the bounds of OFUL and LinTS algorithms. Our promising empirical results on both synthetic and real-world datasets suggested that our algorithms work well in practice compared to other approaches. We believe our work would be useful for further improvements and extensions. There are several interesting open questions. For example, we can extend our work to non-Gaussian distributions to model the unknown reward model parameters and derive regret bounds as long as concentration inequalities can be established. In another direction, we have used NTK in our work, but the NTK theory assumes overparameterised networks and an extension to narrow networks while maintaining the generalization of the reward function is an interesting open problem.

## REFERENCES

- Yasin Abbasi-yadkori, Dávid Pál, and Csaba Szepesvári. Improved algorithms for linear stochastic bandits. In J. Shawe-Taylor, R. Zemel, P. Bartlett, F. Pereira, and K. Q. Weinberger, editors, *Advances in Neural Information Processing Systems*, volume 24, pages 2312–2320. Curran Associates, Inc., 2011. URL <https://proceedings.neurips.cc/paper/2011/file/e1d5be1c7f2f456670de3d53c7b54f4a-Paper.pdf>.
- Marc Abeille and Alessandro Lazaric. Linear Thompson Sampling Revisited. In Aarti Singh and Jerry Zhu, editors, *Proceedings of the 20th International Conference on Artificial Intelligence and Statistics*, volume 54 of *Proceedings of Machine Learning Research*, pages 176–184. PMLR, 20–22 Apr 2017.
- Shipra Agrawal and Navin Goyal. Thompson sampling for contextual bandits with linear payoffs. In Sanjoy Dasgupta and David McAllester, editors, *Proceedings of the 30th International Conference on Machine Learning*, volume 28 of *Proceedings of Machine Learning Research*, pages 127–135, Atlanta, Georgia, USA, 17–19 Jun 2013. PMLR.
- Sanjeev Arora, Simon S Du, Wei Hu, Zhiyuan Li, Russ R Salakhutdinov, and Ruosong Wang. On exact computation with an infinitely wide neural net. In *Advances in Neural Information Processing Systems*, volume 32. Curran Associates, Inc., 2019. URL <https://proceedings.neurips.cc/paper/2019/file/dbc4d84bfcfe2284ballbeffb853a8c4-Paper.pdf>.
- Jackie Baek and Vivek F. Farias. Ts-ucb: Improving on thompson sampling with little to no additional computation, 2021.
- Sébastien Bubeck and Nicolò Cesa-Bianchi. Regret analysis of stochastic and nonstochastic multi-armed bandit problems, 2012.
- Sébastien Bubeck, Nicolò Cesa-Bianchi, and Sham M. Kakade. Towards minimax policies for online linear optimization with bandit feedback. In Shie Mannor, Nathan Srebro, and Robert C. Williamson, editors, *Proceedings of the 25th Annual Conference on Learning Theory*, volume 23 of *Proceedings of Machine Learning Research*, pages 41.1–41.14, Edinburgh, Scotland, 25–27 Jun 2012. PMLR.
- Adam D. Bull. Convergence rates of efficient global optimization algorithms. *J. Mach. Learn. Res.*, 12:2879–2904, November 2011. ISSN 1532-4435.
- Edward Chlebus. An approximate formula for a partial sum of the divergent p-series. *Appl. Math. Lett.*, 22:732–737, 2009.
- Wei Chu, Lihong Li, Lev Reyzin, and Robert Schapire. Contextual bandits with linear payoff functions. In Geoffrey Gordon, David Dunson, and Miroslav Dudík, editors, *Proceedings of the Fourteenth International Conference on Artificial Intelligence and Statistics*, volume 15 of *Proceedings of Machine Learning Research*, pages 208–214, Fort Lauderdale, FL, USA, 11–13 Apr 2011. PMLR.
- Varsha Dani, Thomas P. Hayes, and Sham M. Kakade. Stochastic linear optimization under bandit feedback. In *21st Annual Conference on Learning Theory - COLT 2008, Helsinki, Finland, July 9-12, 2008*, pages 355–366, 2008. URL <http://colt2008.cs.helsinki.fi/papers/80-Dani.pdf>.
- Simon Du, Jason Lee, Haochuan Li, Liwei Wang, and Xiyu Zhai. Gradient descent finds global minima of deep neural networks. In Kamalika Chaudhuri and Ruslan Salakhutdinov, editors, *Proceedings of the 36th International Conference on Machine Learning*, volume 97 of *Proceedings of Machine Learning Research*, pages 1675–1685. PMLR, 09–15 Jun 2019.
- Dheeru Dua and Casey Graff. UCI machine learning repository, 2017. URL <http://archive.ics.uci.edu/ml>.
- Sarah Filippi, Olivier Cappé, Aurélien Garivier, and Csaba Szepesvári. Parametric bandits: The generalized linear case. In J. Lafferty, C. Williams, J. Shawe-Taylor, R. Zemel, and A. Culotta, editors, *Advances in Neural Information Processing Systems*, volume 23. Curran Associates, Inc., 2010. URL <https://proceedings.neurips.cc/paper/2010/file/c2626d850c80ea07e7511bbae4c76f4b-Paper.pdf>.

- Thore Graepel, Joaquin Quiñero Candela, Thomas Borchert, and Ralf Herbrich. Web-scale bayesian click-through rate prediction for sponsored search advertising in microsoft’s bing search engine. *ICML’10*, page 13–20, Madison, WI, USA, 2010. Omnipress. ISBN 9781605589077.
- Kristjan Greenewald, Ambuj Tewari, Predrag Klasnja, and Susan Murphy. Action centered contextual bandits, 2017.
- Wonyoung Kim, Gi soo Kim, and Myunghee Cho Paik. Doubly robust thompson sampling for linear payoffs, 2021.
- Branislav Kveton, Manzil Zaheer, Csaba Szepesvari, Lihong Li, Mohammad Ghavamzadeh, and Craig Boutilier. Randomized exploration in generalized linear bandits. In Silvia Chiappa and Roberto Calandra, editors, *Proceedings of the Twenty Third International Conference on Artificial Intelligence and Statistics*, volume 108 of *Proceedings of Machine Learning Research*, pages 2066–2076. PMLR, 26–28 Aug 2020.
- Tor Lattimore and Csaba Szepesvari. The End of Optimism? An Asymptotic Analysis of Finite-Armed Linear Bandits. In Aarti Singh and Jerry Zhu, editors, *Proceedings of the 20th International Conference on Artificial Intelligence and Statistics*, volume 54 of *Proceedings of Machine Learning Research*, pages 728–737. PMLR, 20–22 Apr 2017.
- Tor Lattimore and Csaba Szepesvári. *Bandit Algorithms*. Cambridge University Press, 2020. doi: 10.1017/9781108571401.
- Lihong Li, Wei Chu, John Langford, and Robert E. Schapire. A contextual-bandit approach to personalized news article recommendation. In Michael Rappa, Paul Jones, Juliana Freire, and Soumen Chakrabarti, editors, *WWW*, pages 661–670. ACM, 2010. ISBN 978-1-60558-799-8.
- Jeffrey Mahler, Florian T. Pokorny, Brian Hou, Melrose Roderick, Michael Laskey, Mathieu Aubry, Kai Kohlhoff, Torsten Kröger, James Kuffner, and Ken Goldberg. Dex-net 1.0: A cloud-based network of 3d objects for robust grasp planning using a multi-armed bandit model with correlated rewards. In *2016 IEEE International Conference on Robotics and Automation (ICRA)*, page 1957–1964. IEEE Press, 2016.
- J. Moćkus. On bayesian methods for seeking the extremum. In G. I. Marchuk, editor, *Optimization Techniques IFIP Technical Conference Novosibirsk, July 1–7, 1974*, pages 400–404, Berlin, Heidelberg, 1975. Springer Berlin Heidelberg. ISBN 978-3-540-37497-8.
- Vu Nguyen, Sunil Gupta, Santu Rana, Cheng Li, and Svetha Venkatesh. Regret for expected improvement over the best-observed value and stopping condition. In Min-Ling Zhang and Yung-Kyun Noh, editors, *Proceedings of the Ninth Asian Conference on Machine Learning*, volume 77 of *Proceedings of Machine Learning Research*, pages 279–294. PMLR, 15–17 Nov 2017.
- Michael A. Osborne. Bayesian gaussian processes for sequential prediction, optimisation and quadrature. 2010.
- Chao Qin, Diego Klabjan, and Daniel Russo. Improving the expected improvement algorithm. In *Proceedings of the 31st International Conference on Neural Information Processing Systems, NIPS’17*, page 5387–5397, Red Hook, NY, USA, 2017. Curran Associates Inc. ISBN 9781510860964.
- Carlos Riquelme, George Tucker, and Jasper Snoek. Deep bayesian bandits showdown: An empirical comparison of bayesian deep networks for thompson sampling. In *International Conference on Learning Representations*, 2018. URL <https://openreview.net/forum?id=SyYe6k-CW>.
- Daniel Russo and Benjamin Van Roy. Learning to optimize via posterior sampling, 2014.
- Daniel Russo and Benjamin Van Roy. Learning to optimize via information-directed sampling. In Z. Ghahramani, M. Welling, C. Cortes, N. Lawrence, and K. Q. Weinberger, editors, *Advances in Neural Information Processing Systems*, volume 27. Curran Associates, Inc., 2014. URL <https://proceedings.neurips.cc/paper/2014/file/301ad0e3bd5cb1627a2044908a42fdc2-Paper.pdf>.

- Ilya O. Ryzhov. On the convergence rates of expected improvement methods. *Oper. Res.*, 64(6): 1515–1528, 2016. doi: 10.1287/opre.2016.1494. URL <https://doi.org/10.1287/opre.2016.1494>.
- Michal Valko, Nathan Korda, Rémi Munos, Ilias Flaounas, and Nello Cristianini. Finite-time analysis of kernelised contextual bandits. In *Proceedings of the Twenty-Ninth Conference on Uncertainty in Artificial Intelligence*, UAI’13, page 654–663, Arlington, Virginia, USA, 2013. AUAI Press.
- Ziyu Wang and Nando de Freitas. Theoretical analysis of bayesian optimisation with unknown gaussian process hyper-parameters, 2014.
- Pan Xu, Zheng Wen, Handong Zhao, and Quanquan Gu. Neural contextual bandits with deep representation and shallow exploration, 2020.
- Dawei Zhan and Huanlai Xing. Expected improvement for expensive optimization: a review. *J. Glob. Optim.*, 78(3):507–544, 2020. doi: 10.1007/s10898-020-00923-x. URL <https://doi.org/10.1007/s10898-020-00923-x>.
- Weitong Zhang, Dongruo Zhou, Lihong Li, and Quanquan Gu. Neural thompson sampling. In *International Conference on Learning Representations*, 2021. URL <https://openreview.net/forum?id=tkAtoZkcUnm>.
- Dongruo Zhou, Lihong Li, and Quanquan Gu. Neural contextual bandits with UCB-based exploration. In Hal Daumé III and Aarti Singh, editors, *Proceedings of the 37th International Conference on Machine Learning*, volume 119 of *Proceedings of Machine Learning Research*, pages 11492–11502. PMLR, 13–18 Jul 2020.

# Supplementary Material

## A ADDITIONAL EXPERIMENTS

### A.1 LINEAR BANDITS

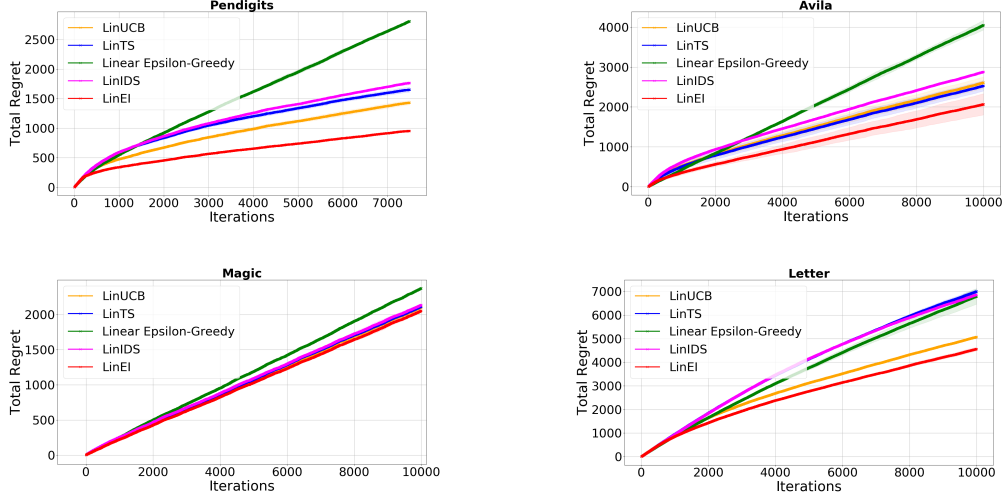

Figure 4: Comparison of LinEI and baseline algorithms on datasets.

### A.2 LINEAR BANDITS FOR THE LARGE $T$

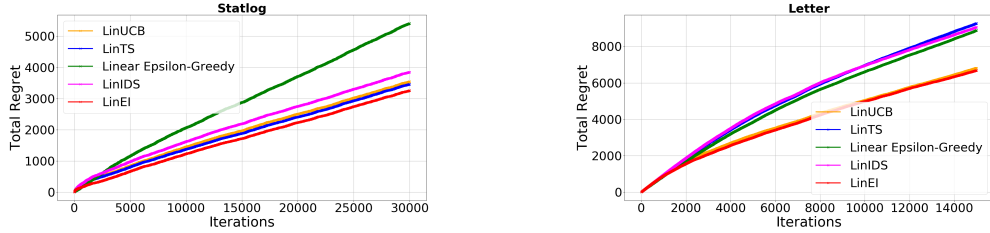

Figure 5: Comparison of LinEI and baseline algorithms on datasets.

## B ADDITIONAL RELATED WORKS

**EI for Bayesian Optimization** There are several works that use EI to solve Bayesian optimization which is a non-contextual bandit such as (Nguyen et al., 2017) and (Wang and de Freitas, 2014).

(Wang and de Freitas, 2014) is an unpublished since 2014 and we believe that the technical analysis in this paper seem incorrect. For example, while their proof depends crucially on Lemma 10, we found a possible error in the proof of Lemma 10. For Lemma 10 to hold, the authors needed to lower bound the posterior variance function  $\sigma_{t-1}^2(x)$  at  $x = x_t^+$  as  $\sigma_{t-1}^2(x_t^+) \geq \sigma^2/(t-1+\sigma^2)$  where  $\sigma_{t-1}(\cdot)$  is the posterior variance function at time  $t-1$ ,  $x_t^+ = \arg\max \mu_{t-1}(x)$ . However, as per their proof, this inequality holds for any  $x$ , i.e., the function  $\sigma_{t-1}(x)$  has a lower bound for any  $x$ , which seems strange.

(Nguyen et al., 2017) proposed a solution to avoid this error by using a user-defined parameter  $\kappa$  to prevent the posterior variance function  $\sigma_{t-1}(\cdot)$  to exceed this lower bound  $\kappa$ . By this way they can

derive an upper bound for their EI algorithm, however the regret bound depends on  $\kappa$  and, as  $\kappa \rightarrow 0$ , this bound quickly explodes and thus, their algorithm does not converge.

Compared to (Nguyen et al., 2017), our algorithm converges with a sublinear rate for the cumulative regret. In addition, while most of EI algorithms are designed to theoretical analysis for the simple regret, these two works (Nguyen et al., 2017) and (Wang and de Freitas, 2014) are rare to focus on analyzing EI for the cumulative regret, however these analysis are incomplete. Thus in our knowledge, our algorithm is the first EI in the literature which obtains a sublinear cumulative regret guarantee.

**On the asymptotic regret** (Lattimore and Szepesvari, 2017) analyzed the asymptotic regret for linear bandits. While showing that both optimism principle and Thompson sampling cannot be close to asymptotically optimal in the setting of linear bandits, Lattimore and Szepesvari (2017) proposed a new allocation matching based algorithm that obtains an optimal asymptotic regret. In this paper we analyze the worse-case regret of EI-based algorithms for the linear contextual bandits and neural contextual bandits which are more general than the linear bandit considered in (Lattimore and Szepesvari, 2017). To our knowledge, the analysis of the optimal asymptotic regret for contextual bandits as we consider (where context may be controlled by an adversary) is still an open problem.

## C CHALLENGES IN COMBINING EI WITH CONTEXTUAL BANDITS

First, we show that the “best arm” identification (BAI) problem does not exist in the setting of the contextual bandit problem. We start from the setting of a standard MAB problem with  $K$  arms. The mean reward of arm  $i$ , where  $i \in [K]$ , denoted by  $\mu_i$  is unknown but fixed. We assume that  $\mu_1 > \mu_2 > \dots > \mu_K$  i.e., the arm 1 is the best arm. The goal of the best arm identification is to identify the arm 1. However, in the contextual bandits with the linear reward function, the mean reward of arm  $i$  is additionally associated with a context  $x_{i,t}$  which is controlled by an adversary. It follows that the mean reward for each arm  $i$  can be different in all iterations in this setting. Thus, the concept “best arm” over time which is the arm with highest mean reward does not exist in this setting. In context bandits that we consider, it would be more suitable to identify an arm at each iteration such that the cumulative regret is as small as possible. This means that the goal of our problem is different from that of BAI.

In the standard MAB setting, the EI strategy suggests the arm that offers the largest amount of improvement upon the largest posterior mean among all arms which is computed at current time. Therefore, an improvement based strategy like EI seems suitable for BAI problem whose goal is to seek the arm with the best reward. Combining EI technique with the allocation technique (Qin et al., 2017) where we seek to allocate enough the number of samples to suboptimal arms so that we can eliminate these arm with a high confidence, is enough to solve BAI.

In contextual bandits where the best arm does not exist, and even the mean reward of any arm can be different in all iterations, the allocation technique is not suitable anymore, and the standard EI strategy seems not achieve its power. It is because we can not transfer knowledge among iterations because the mean reward of each arm is not fixed anymore as in the standard MAB setting. To make use of EI technique for the goal to minimize the cumulative regret, we have a crucial observation that when the largest EI value (i.e.,  $\max_{i \in \mathcal{K}} \alpha_{i,t}^{EI}$ ) is small, by choosing the arm with the largest posterior reward mean instead that with the largest EI, we can make tighter the regret. This make our algorithm different from the standard EI algorithm which we believe that it is impossible to solve contextual bandits. The second technical challenge just is how to determining when we use the arm with the largest posterior reward mean instead that with the largest EI. Here we propose to use a decreasing function of  $t$  in the form of  $\frac{C_0}{t^\beta}$ , where  $C_0$  is chosen in the interval  $[\sqrt{d}, d]$  and  $\beta$  is chosen in the interval  $[0.5, 3]$  as we explained in the proof of Theorem 1. By this choice, we show that our algorithm achieve an optimal regret bound like LinUCB.

## D REGRET ANALYSIS FOR LINEI ALGORITHM

### D.1 AUXILIARY RESULTS

For our theoretical analysis for LinEI, we use the following auxiliary lemmas from the literature.

**Lemma 1** (Lemma 1 of (Agrawal and Goyal, 2013)). *For all  $t$ ,  $0 < \delta < 1$ , with probability  $1 - \frac{\delta}{t^2}$ , we have*

$$\forall i : |x_{i,t}^T \hat{\theta}_t - x_{i,t}^T \theta^*| \leq \beta_t s_{i,t},$$

where  $\beta_t = R\sqrt{d \ln(\frac{t^3}{\delta})} + 1$ , and  $s_{i,t} = \sqrt{x_{i,t}^T X(t)^{-1} x_{i,t}}$ .

**Lemma 2.** (*Upper Bounds of a Hyperharmonic Series, (Chlebus, 2009)*) *Given a hyperharmonic series  $p_n = \sum_{t=1}^n \frac{1}{t^\beta}$ , where  $n \in \mathbb{N}$ . Then,*

- $p_n < 1 + \frac{n^{1-\beta}-1}{1-\beta}$  if  $\beta \geq 0$  and  $\beta \neq 1$ ,
- $p_n < 1 + \ln(n)$  if  $\beta = 1$

**Lemma 3** (Lemma 3 of (Chu et al., 2011)). *For  $T \geq 2$ , we have*

$$\sum_{i=1}^T s_{a(t),t} \leq 5\sqrt{dT \ln(T)}.$$

## D.2 PROOF FOR THEOREM 1

Before we proceed to analyze the regret bound of LinEI, we need the following lemma to lower bound and upper bound the expected improvement for each arm  $i \in [K]$ .

**Lemma 4.** *Pick  $0 < \delta < 1$ . Set  $I_{i,t} = \max\{0, x_{i,t}^T \theta^* - r_t^+\}$ . Then with probability  $1 - \frac{\delta}{t^2}$  we have*

$$I_{i,t} - \beta_t s_{i,t} \leq \alpha_{i,t}^{EI} \leq I_{i,t} + (\beta_t + v_t) s_{i,t}.$$

*Proof.* If  $s_i(t) = 0$  then  $\alpha_{i,t}^{EI} = I_{i,t}$ , which makes the result trivial. We now assume that  $s_{i,t} > 0$ .

Set  $q = \frac{x_{i,t}^T \theta^* - r_t^+}{s_{i,t}}$  and  $u = \frac{x_{i,t}^T \hat{\theta}_t - r_t^+}{s_{i,t}}$ . Set  $\tau(z) = z\Phi(z) + \phi(z)$ . Then we have that

$$\alpha_{i,t}^{EI} = v_t s_{i,t} \tau\left(\frac{u}{v_t}\right).$$

By Lemma 1, we have that  $|u - q| \leq \beta_t$  with probability  $1 - \delta$ . As  $\tau'(z) = \Phi(z) \in [0, 1]$ ,  $\tau$  is non-decreasing and  $\tau(z) \leq 1 + z$  for  $z > 0$ . Hence,

$$\begin{aligned} \alpha_{i,t}^{EI} &\leq v_t s_{i,t} \tau\left(\frac{\max\{0, q\} + \beta_t}{v_t}\right) \\ &\leq v_t s_{i,t} \left(\frac{\max\{0, q\} + \beta_t}{v_t} + 1\right) \\ &= I_{i,t} + (\beta_t + v_t) s_{i,t} \end{aligned}$$

If  $I_{i,t} = 0$  then the lower bound is trivial as  $\alpha_{i,t}^{EI}$  is non-negative. Thus suppose  $I_{i,t} > 0$ . Since  $\alpha_{i,t}^{EI} \geq 0$  and  $\tau(z) \geq 0$  for all  $z$ , and  $\tau(z) = z + \tau(-z) \geq z$ . Therefore,

$$\begin{aligned} \alpha_{i,t}^{EI} &\geq v_t s_{i,t} \tau\left(\frac{q - \beta_t}{v_t}\right) \\ &\geq v_t s_{i,t} \left(\frac{q - \beta_t}{v_t}\right) \\ &= I_{i,t} - \beta_t s_{i,t} \end{aligned}$$

□

We now analyze the cumulative regret  $R(T)$ . To do this, we upper bound  $r_t = x_{a^*(t),t}^T \theta^* - x_{a(t),t}^T \theta^*$ . We break down  $r_t$  into two terms as follows:

$$\begin{aligned} r_t &= x_{a^*(t),t}^T \theta^* - x_{a(t),t}^T \theta^* \\ &= \underbrace{x_{a^*(t),t}^T \theta^* - r_t^+}_{\text{Term 1}} + \underbrace{r_t^+ - x_{a(t),t}^T \theta^*}_{\text{Term 2}}, \end{aligned}$$

where  $r_t^+ = \max_{i \in [K]} \{x_{i,t}^T \hat{\theta}_t\}$ . We will upper bound Term 1 and Term 2 according to two cases of  $a(t)$ .

### D.3 CONSIDERING THE CASE $a(t) = \bar{a}(t)$

This condition happens when  $\alpha_{\bar{a}(t),t}^{EI} \geq \frac{C_0}{t^\beta}$ .

#### Bounding Term 1

**Lemma 5.** *Pick  $\delta \in (0, 1)$ . Then with probability at least  $1 - \frac{\delta}{t^2}$  we have*

$$x_{a^*(t),t}^T \theta^* - r_t^+ \leq \frac{\tau(\frac{\beta_t}{v_t})}{\tau(-\frac{\beta_t}{v_t})} (2\beta_t + v_t) s_{a(t),t}.$$

*Proof.* First, we consider  $s_{a^*(t),t} > 0$ . If  $x_{a^*(t),t}^T \theta^* < r_t^+$  then the lemma will be trivial. We now consider  $x_{a^*(t),t}^T \theta^* \geq r_t^+$ . Following the derivation of the acquisition function  $\alpha^{EI}$ , we have  $\alpha_{a^*(t),t}^{EI} = v_t s_{a^*(t),t} \tau(\frac{x_{a^*(t),t}^T \hat{\theta}_t - r_t^+}{v_t s_{a^*(t),t}})$ . Further, we also have  $\frac{x_{a^*(t),t}^T \hat{\theta}_t - r_t^+}{v_t s_{a^*(t),t}} \geq \frac{-\beta_t}{v_t}$  with probability  $1 - \frac{\delta}{t^2}$ . It is because  $x_{a^*(t),t}^T \hat{\theta}_t - x_{a^*(t),t}^T \theta^* \geq -\beta_t s_{a^*(t),t}$  with probability  $1 - \frac{\delta}{t^2}$  and we are considering the case when  $x_{a^*(t),t}^T \theta^* \geq r_t^+$ . Therefore,  $\alpha_{a^*(t),t}^{EI} \geq v_t \tau(\frac{-\beta_t}{v_t}) s_{a^*(t),t}$  with probability  $1 - \frac{\delta}{t^2}$ .

Now, we combine inequalities  $\alpha_{a^*(t),t}^{EI} \geq v_t \tau(\frac{-\beta_t}{v_t}) s_{a^*(t),t}$  and  $\alpha_{a^*(t),t}^{EI} \geq I_{a^*(t),t} - \beta_t s_{a^*(t),t}$  which is proven in Lemma 4, we obtain the following inequality:

$$I_{a^*(t),t} \leq \frac{\tau(\frac{\beta_t}{v_t})}{\tau(-\frac{\beta_t}{v_t})} \alpha_{a^*(t),t}^{EI} \quad (6)$$

Here we use the fact  $\tau(z) = z + \tau(-z)$ . Finally, with probability at least  $1 - \frac{\delta}{t^2}$  we achieve

$$\begin{aligned} x_{a^*(t),t}^T \theta^* - r_t^+ &\leq I_{a^*(t),t} \\ &\leq \frac{\tau(\frac{\beta_t}{v_t})}{\tau(-\frac{\beta_t}{v_t})} \alpha_{a^*(t),t}^{EI} \\ &\leq \frac{\tau(\frac{\beta_t}{v_t})}{\tau(-\frac{\beta_t}{v_t})} \alpha_{a(t),t}^{EI} \\ &\leq \frac{\tau(\frac{\beta_t}{v_t})}{\tau(-\frac{\beta_t}{v_t})} (\max\{0, x_{a(t),t}^T \hat{\theta}_t - r_t^+\} + (\beta_t + v_t) s_{a(t),t}) \\ &\leq \frac{\tau(\frac{\beta_t}{v_t})}{\tau(-\frac{\beta_t}{v_t})} (\max\{0, x_{a(t),t}^T \hat{\theta}_t + \beta_t s_{a(t),t} - r_t^+\} + (\beta_t + v_t) s_{a(t),t}) \\ &\leq \frac{\tau(\frac{\beta_t}{v_t})}{\tau(-\frac{\beta_t}{v_t})} (\max\{0, \beta_t s_{a(t),t}\} + (\beta_t + v_t) s_{a(t),t}) \\ &= \frac{\tau(\frac{\beta_t}{v_t})}{\tau(-\frac{\beta_t}{v_t})} (2\beta_t + v_t) s_{a(t),t}, \end{aligned}$$

where the first inequality holds by the definition of the function  $I_t$ . The second one comes from Eq(8). The third one holds by the property of the chosen point  $a(t) = \arg\max_{i \in [K]} \alpha_{i,t}^{EI}$ . The fourth inequality holds due to Lemma 1. The sixth inequality holds due to the fact that  $x_{a(t),t}^T \hat{\theta}_t \leq r_t^+$ .

Second, if  $s_{a^*(t),t} = 0$  then by definition of  $\alpha_{a^*(t),t}^{EI}$ , we have  $\alpha_{a^*(t),t}^{EI} = I_{a^*(t),t}$ . We have  $I_{a^*(t),t} = \alpha_{a^*(t),t}^{EI} \leq \alpha_{a(t),t}^{EI}$ , where we use the definition  $\alpha_{a(t),t}^{EI} = \max_{i \in [K]} \alpha_{i,t}^{EI}$ . Similar to the above proof, we obtain  $x_{a^*(t),t}^T \theta^* - r_t^+ \leq (2\beta_t + v_t) s_{a(t),t} \leq \frac{\tau(\frac{\beta_t}{v_t})}{\tau(-\frac{\beta_t}{v_t})} (2\beta_t + v_t) s_{a(t),t}$  because  $\frac{\tau(\frac{\beta_t}{v_t})}{\tau(-\frac{\beta_t}{v_t})} \geq \frac{\tau(0)}{\tau(0)} = 1$ . Thus, the lemma holds.  $\square$



**Bounding Term 2**

**Lemma 6.** Pick a  $\delta \in (0, 1)$ . Then with probability  $1 - \frac{\delta}{t^2}$  we have

$$r_t^+ - x_{a(t),t}^T \theta^* \leq (\sqrt{2\ln(Rt^\beta) + 6\sqrt{C_0^{-2}d\ln(\frac{t+1}{\delta})}} + 1)v_t s_{a(t),t}.$$

*Proof.* We have

$$\begin{aligned} \alpha_{a(t),t}^{EI} &= (x_{a(t),t}^T \hat{\theta}_t - r_t^+) \Phi\left(\frac{x_{a(t),t}^T \hat{\theta}_t - r_t^+}{v_t s_{a(t),t}}\right) + v_t s_{a(t),t} \phi\left(\frac{x_{a(t),t}^T \hat{\theta}_t - r_t^+}{v_t s_{a(t),t}}\right) \\ &\leq v_t s_{a(t),t} \phi\left(\frac{x_{a(t),t}^T \hat{\theta}_t - r_t^+}{v_t s_{a(t),t}}\right) \\ &= v_t s_{a(t),t} \frac{1}{2\sqrt{\pi}} \exp\left(-\frac{1}{2}\left(\frac{x_{a(t),t}^T \hat{\theta}_t - r_t^+}{v_t s_{a(t),t}}\right)^2\right) \end{aligned}$$

where the first inequality holds due to the definition of action  $a(t)$ . The second equality holds due to the definition of  $\alpha_{a(t),t}^{EI}$ . The second inequality comes from the fact that  $x_{a(t),t}^T \hat{\theta}_t \leq r_t^+$ . The third equality holds due to the definition of function  $\phi(\cdot)$ .

From the last inequality, we obtain

$$|x_{a(t),t}^T \hat{\theta}_t - r_t^+| \leq \sqrt{2\ln\left(\frac{v_t s_{a(t),t}}{\alpha_{a(t),t}^{EI}}\right)} v_t s_{a(t),t}.$$

By using the condition that  $\alpha_{a(t),t}^{EI} \geq \frac{C_0}{t^\beta}$  and the facts that  $s_{a(t),t} \leq 1$ ,  $v_t = R\sqrt{9d\ln(\frac{t}{\delta})}$ , we have

$$|x_{a(t),t}^T \hat{\theta}_t - r_t^+| \leq \sqrt{2\log\left(\frac{R\sqrt{9d\ln(\frac{t+1}{\delta})}t^\beta}{C_0}\right)} v_t s_{a(t),t} = \sqrt{2\ln(Rt^\beta) + 6\sqrt{C_0^{-2}d\ln(\frac{t+1}{\delta})}} v_t s_{a(t),t}.$$

Finally, we have

$$\begin{aligned} r_t^+ - x_{a(t),t}^T \theta^* &= (r_t^+ - x_{a(t),t}^T \hat{\theta}_t) + (x_{a(t),t}^T \hat{\theta}_t - x_{a(t),t}^T \theta^*) \\ &\leq \sqrt{2\ln(Rt^\beta) + 6\sqrt{C_0^{-2}d\ln(\frac{t+1}{\delta})}} v_t s_{a(t),t} + v_t s_{a(t),t} \\ &= (\sqrt{2\ln(Rt^\beta) + 6\sqrt{C_0^{-2}d\ln(\frac{t+1}{\delta})}} + 1)v_t s_{a(t),t} \end{aligned}$$

□

Combining Lemma 5 and 6 we have

$$\begin{aligned} x_{a^*(t),t}^T \theta^* - x_{a(t),t}^T \theta^* &= (x_{a^*(t),t}^T \theta^* - r_t^+) + (r_t^+ - x_{a(t),t}^T \theta^*) \\ &\leq \frac{\tau(\frac{\beta_t}{v_t})}{\tau(-\frac{\beta_t}{v_t})} (2\beta_t + v_t) s_{a(t),t} + (\sqrt{2\ln(Rt^\beta) + 6\sqrt{C_0^{-2}d\ln(\frac{t+1}{\delta})}} + 1)v_t s_{a(t),t} \\ &\leq \left[\frac{\tau(\frac{\beta_t}{v_t})}{\tau(-\frac{\beta_t}{v_t})} (2\beta_t + v_t) + (\sqrt{2\ln(Rt^\beta) + 6\sqrt{C_0^{-2}d\ln(\frac{t+1}{\delta})}} + 1)\right] v_t s_{a(t),t} \end{aligned}$$

D.4 CONSIDERING THE CASE  $a(t) = \text{ARGMAX}_{i \in [K]} \{x_{i,t}^T \hat{\theta}_t\}$

### Bounding Term 1

**Lemma 7.** Pick  $\delta \in (0, 1)$ . Then with probability at least  $1 - \frac{\delta}{t^2}$  we have

$$x_{a^*(t),t}^T \theta^* - r_t^+ \leq \frac{\tau(\frac{\beta_t}{v_t})}{\tau(-\frac{\beta_t}{v_t})} \frac{C_0}{t^\beta}.$$

*Proof.* If  $s_{a^*(t),t} = 0$  then by definition of  $\alpha_{a^*(t),t}^{EI}$ ,  $\alpha_{a^*(t),t}^{EI} = I_{a^*(t),t}$ . We have  $I_{a^*(t),t} = \alpha_{a^*(t),t}^{EI} \leq \alpha_{a(t),t}^{EI} \leq \frac{C_0}{t^\beta}$ .

We now consider  $s_{a^*(t),t} > 0$ . If  $x_{a^*(t),t}^T \theta^* < r_t^+$  then the lemma will be trivial. We now consider  $x_{a^*(t),t}^T \theta^* \geq r_t^+$ . Following the derivation of the acquisition function  $\alpha^{EI}$ , we have  $\alpha_{a^*(t),t}^{EI} = v_t s_{a^*(t),t} \tau(\frac{x_{a^*(t),t}^T \hat{\theta}_t - r_t^+}{v_t s_{a^*(t),t}})$ . Further, we also have  $\frac{x_{a^*(t),t}^T \hat{\theta}_t - r_t^+}{v_t s_{a^*(t),t}} \geq \frac{-\beta_t}{v_t}$  with probability  $1 - \frac{\delta}{t^2}$ . It is because  $x_{a^*(t),t}^T \hat{\theta}_t - x_{a^*(t),t}^T \theta^* \geq -\beta_t s_{a^*(t),t}$  with probability  $1 - \frac{\delta}{t^2}$  and we are considering the case when  $x_{a^*(t),t}^T \theta^* \geq r_t^+$ . Therefore,  $\alpha_{a^*(t),t}^{EI} \geq v_t \tau(\frac{-\beta_t}{v_t}) s_{a^*(t),t}$  with probability  $1 - \frac{\delta}{t^2}$ .

Now, we combine inequalities  $\alpha_{a^*(t),t}^{EI} \geq v_t \tau(\frac{-\beta_t}{v_t}) s_{a^*(t),t}$  and  $\alpha_{a^*(t),t}^{EI} \geq I_{a^*(t),t} - \beta_t s_{a^*(t),t}$  which is proven in Lemma 4, we obtain the following inequality:

$$I_{a^*(t),t} \leq \frac{\tau(\frac{\beta_t}{v_t})}{\tau(-\frac{\beta_t}{v_t})} \alpha_{a^*(t),t}^{EI} \quad (7)$$

Here we use the fact  $\tau(z) = z + \tau(-z)$ . Finally, with probability at least  $1 - \frac{\delta}{t^2}$  we achieve

$$\begin{aligned} x_{a^*(t),t}^T \theta^* - r_t^+ &\leq I_{a^*(t),t} \\ &\leq \frac{\tau(\frac{\beta_t}{v_t})}{\tau(-\frac{\beta_t}{v_t})} \alpha_{a^*(t),t}^{EI} \\ &\leq \frac{\tau(\frac{\beta_t}{v_t})}{\tau(-\frac{\beta_t}{v_t})} \alpha_{a(t),t}^{EI} \\ &\leq \frac{\tau(\frac{\beta_t}{v_t})}{\tau(-\frac{\beta_t}{v_t})} \frac{C_0}{t^\beta} \end{aligned}$$

where the first inequality holds by the definition of the function  $I_t$ . The second one comes from Eq(7). The third one holds by the definition of  $\bar{a}(t)$ . The fourth one holds because  $\alpha_{\bar{a}(t),t}^{EI} \leq \frac{C_0}{t^\beta}$ .  $\square$

### Bounding Term 2

**Lemma 8.** Pick a  $\delta \in (0, 1)$ . Then with probability  $1 - \frac{\delta}{t^2}$  we have

$$r_t^+ - x_{a(t),t}^T \theta^* \leq v_t s_{a(t),t}.$$

*Proof.* By definition  $a(t) = \text{argmax}_{i \in [K]} \{x_{i,t}^T \hat{\theta}_t\}$ , we have  $r_t^+ = x_{a(t),t}^T \hat{\theta}_t$ . By Lemma 1, we have  $r_t^+ - x_{a(t),t}^T \theta^* \leq v_t s_{a(t),t}$ . The lemma holds.  $\square$

Combining Lemma 7 and 8 we have

$$\begin{aligned} x_{a^*(t),t}^T \theta^* - x_{a(t),t}^T \theta^* &= (x_{a^*(t),t}^T \theta^* - r_t^+) + (r_t^+ - x_{a(t),t}^T \theta^*) \\ &\leq \frac{\tau(\frac{\beta_t}{v_t})}{\tau(-\frac{\beta_t}{v_t})} \frac{C_0}{t^\beta} + v_t s_{a(t),t} \end{aligned}$$

For all these cases, we obtain the following bound of the regret  $x_{a^*(t),t}^T \theta^* - x_{a(t),t}^T \theta^*$ .

**Lemma 9.** For every  $1 \leq t \leq T$ , with probability  $1 - \frac{\delta}{t^2}$  we always have

$$x_{a^*(t),t}^T \theta^* - x_{a(t),t}^T \theta^* \leq \left[ \frac{\tau(\frac{\beta_t}{v_t})}{\tau(-\frac{\beta_t}{v_t})} (2\beta_t + v_t) + \left( \sqrt{2\ln(Rt^\beta)} + 6\sqrt{C_0^{-2} d \ln(\frac{t+1}{\delta})} + 1 \right) v_t \right] s_{a(t),t} + \frac{\tau(\frac{\beta_t}{v_t})}{\tau(-\frac{\beta_t}{v_t})} \frac{C_0}{t^\beta}.$$

Now we seek to bound  $\frac{\tau(\frac{\beta_t}{v_t})}{\tau(-\frac{\beta_t}{v_t})}$  via the following lemma.

**Lemma 10.** Pick a  $\delta \in (0, 1)$ . There exists a constant  $C > 0$  which is independent of  $T, K$  such that for every  $t \geq 1$  we have that

$$\frac{\tau(\frac{\beta_t}{v_t})}{\tau(-\frac{\beta_t}{v_t})} \leq C.$$

*Proof.*

$$\begin{aligned} \frac{\beta_t}{v_t} &= \frac{R\sqrt{d\ln(\frac{t^3}{\delta})} + 1}{R\sqrt{9d\ln(\frac{t+1}{\delta})}} \\ &= \frac{\sqrt{\ln(\frac{t^3}{\delta})}}{\sqrt{9\ln(\frac{t+1}{\delta})}} + \frac{1}{R\sqrt{9d\ln(\frac{t+1}{\delta})}} \\ &\leq \frac{\sqrt{\ln(\frac{t^3}{\delta})}}{\sqrt{9\ln(\frac{t+1}{\delta})}} + \frac{1}{R} \\ &\leq \frac{\sqrt{\ln(\frac{(t+1)^3}{\delta^3})}}{\sqrt{9\ln(\frac{t+1}{\delta})}} + \frac{1}{R} \\ &\leq \frac{1}{\sqrt{3}} + \frac{1}{R}, \end{aligned}$$

where the first inequality holds because  $\sqrt{9d\ln(\frac{t+1}{\delta})} > 1$  due to  $\delta < 1$  and  $t \geq 1$ . The second inequality holds also due to  $\delta < 1$ .

We set  $C' = \frac{1}{\sqrt{3}} + \frac{1}{R}$ . Since the function  $\tau(\cdot)$  is non-decreasing, we have that,  $\tau(\frac{\beta_t}{v_t}) \leq \tau(C')$  and  $\tau(-\frac{\beta_t}{v_t}) \geq \tau(-C')$ . Thus,

$$\frac{\tau(\frac{\beta_t}{v_t})}{\tau(-\frac{\beta_t}{v_t})} \leq \frac{\tau(C')}{\tau(-C')} = C.$$

□

We now are ready to prove Theorem 1.

**Theorem 3.** Given any  $\delta \in (0, 1)$ . If  $\sqrt{d} \leq C_0 \leq d$  and  $0.5 \leq \beta \leq 3$  then with probability  $1 - \delta$ , the cumulative regret of the Expected Improvement algorithm is bounded as

$$R(T) = \mathcal{O}(d\sqrt{T\ln^2(T)\ln\frac{T}{\delta}}).$$

*Proof.* For every  $1 \leq t \leq T$ , we have

$$\begin{aligned}
x_{a^*(t),t}^T \theta^* - x_{a(t),t}^T \theta^* &\leq \left[ \frac{\tau(\frac{\beta_t}{v_t})}{\tau(-\frac{\beta_t}{v_t})} (2\beta_t + v_t) + \left( \sqrt{2\ln(Rt^\beta)} + 6\sqrt{C_0^{-2}d\ln(\frac{t+1}{\delta})} + 1 \right) v_t \right] s_{a(t),t} + \frac{\tau(\frac{\beta_t}{v_t})}{\tau(-\frac{\beta_t}{v_t})} \frac{C_0}{t^\beta} \\
&\leq [C(2\beta_t + v_t) + (\sqrt{2\ln(Rt^\beta)} + 6\sqrt{C_0^{-2}d\ln(\frac{t+1}{\delta})} + 1)v_t] s_{a(t),t} + \frac{CC_0}{t^\beta} \\
&\leq [C(2\beta_T + v_T) + (\sqrt{2\ln(RT^\beta)} + 6\sqrt{C_0^{-2}d\ln(\frac{T+1}{\delta})} + 1)v_T] s_{a(t),t} + \frac{CC_0}{t^\beta}
\end{aligned}$$

Thus,

$$\begin{aligned}
R(T) &= \sum_{t=1}^T x_{a^*(t),t}^T \theta^* - x_{a(t),t}^T \theta^* \\
&= \sum_{t=1}^T [C(2\beta_T + v_T) + (\sqrt{2\ln(RT^\beta)} + 6\sqrt{C_0^{-2}d\ln(\frac{T+1}{\delta})} + 1)v_T] s_{a(t),t} + \frac{CC_0}{t^\beta} \\
&= [C(2\beta_T + v_T) + (\sqrt{2\ln(RT^\beta)} + 6\sqrt{C_0^{-2}d\ln(\frac{T+1}{\delta})} + 1)v_T] \sum_{t=1}^T s_{a(t),t} + \sum_{t=1}^T \frac{CC_0}{t^\beta} \\
&\leq 5[C(2R\sqrt{d\ln(\frac{T^3}{\delta})} + 1 + R\sqrt{9d\ln(\frac{T+1}{\delta})}) \\
&\quad + R(\sqrt{2\ln(RT^\beta)} + 6\sqrt{C_0^{-2}d\ln(\frac{T+1}{\delta})} + 1)\sqrt{9d\ln(\frac{T+1}{\delta})}] \sqrt{dT\ln(T)} + \sum_{t=1}^T \frac{CC_0}{t^\beta},
\end{aligned}$$

where the inequality holds by using Lemma 3. We consider three cases:

- if  $\beta = 1$  then by Lemma 2,  $\sum_{t=1}^T \frac{1}{t^\beta} \leq 1 + \ln T$ . Hence, using the assumption that  $\sqrt{d} \leq C_0 \leq d$ , we get that  $C_0^{-2}d \leq 1$  and  $C_0 C \sum_{t=1}^T \frac{1}{t^\beta} \leq Cd(1 + \ln T)$ . Thus,  $R(T) = \mathcal{O}(d\sqrt{T\ln^2(T)\ln\frac{T}{\delta}})$ .
- if  $\beta \neq 1$  then by Lemma 2,  $\sum_{t=1}^T \frac{1}{t^\beta} \leq 1 + \frac{T^{1-\beta}-1}{1-\beta}$ . Combining with the assumption that  $1/2 \leq \beta \leq 3$ , we consider two cases:
  - if  $1/2 \leq \beta < 1$ , we have  $\sum_{t=1}^T \frac{1}{t^\beta} \leq 1 + \frac{T^{1-\beta}-1}{1-\beta} \leq 1 + 2(\sqrt{T} - 1)$ . Hence,  $CC_0 \sum_{t=1}^T \frac{1}{t^\beta} \leq Cd(1 + 2(\sqrt{T} - 1))$ . Thus,  $R(T) = \mathcal{O}(d\sqrt{T\ln^2(T)\ln\frac{T}{\delta}})$ .
  - if  $1 < \beta \leq 3$ , then  $\sum_{t=1}^T \frac{1}{t^\beta} \leq 1 + \frac{T^{1-\beta}-1}{1-\beta} \leq 1$  and  $T^\beta \leq T^3$ . Thus,  $R(T) = \mathcal{O}(d\sqrt{T\ln^2(T)\ln\frac{T}{\delta}})$ .

□

**Remark.** We choose  $C_0 \in [\sqrt{d}, d]$  to eliminate the term  $d$  in the expression  $6\sqrt{C_0^{-2}d\ln(\frac{T}{\delta})}$  and ensure that the term  $\sum_{i=1}^T \frac{CC_0}{t^\beta} = \mathcal{O}(d\sqrt{d})$ . We choose  $\beta \leq 3$  to ensure that the order of  $R(T)$  is the same as the case when  $1/2 \leq \beta < 1$ . For  $\beta > 3$ , the higher  $\beta$ , the larger the cumulative regret is.

**Remark.** Upper bounding “directly” the regret  $r_t = x_{a^*(t),t}^T \theta^* - x_{a(t),t}^T \theta^*$  is very challenging because we can not exploit properties from EI strategy. We break down  $r_t$  into two terms as we explained in the paper:  $r_t = (x_{a^*(t),t}^T \theta^* - r_t^+) + (r_t^+ - x_{a(t),t}^T \theta^*)$ . While the first term can be bounded by using the properties of EI, bounding the second term is a challenge which we believe that a standard EI is impossible to solve.

Indeed, as we showed in Lemma 6, using the EI technique for the contextual bandits, the second term  $(r_t^+ - x_{a(t),t}^T \theta^*)$  can be bounded as

$$|x_{a(t),t}^T \hat{\theta}_t - r_t^+| \leq \sqrt{2\ln\left(\frac{v_t s_{a(t),t}}{\alpha_{a(t),t}^{EI}}\right) v_t s_{a(t),t}}.$$

We can see that when  $\alpha_{a(t),t}^{EI} \rightarrow 0$ ,  $\sqrt{2\ln\left(\frac{v_t s_{a(t),t}}{\alpha_{a(t),t}^{EI}}\right) v_t s_{a(t),t}} \rightarrow \infty$ . Hence, the smaller the largest EI value is, the larger the bound for second term is, so the larger the upper bound for regret  $r_t$ . Thus, to obtain an optimal rate for EI in this case is a challenge! Fortunately, we have a crucial observation that when the largest EI value is small, by choosing the arm with the largest posterior reward mean instead that with the largest EI, we can obtain an upper bound smaller for the second term as  $(r_t^+ - x_{a(t),t}^T \theta^*) \leq v_t s_{a(t),t}$  (see Lemma 8) while still upper bound the first term  $(x_{a^*(t),t}^T \theta^* - r_t^+)$  as  $(x_{a^*(t),t}^T \theta^* - r_t^+) \leq \frac{\tau(\frac{\beta_t}{v_t})}{\tau(-\frac{\beta_t}{v_t})} \frac{C_0}{t^\beta}$  (see Lemma 7). By this way, the difficulty now depends on how to determining when we use the arm with the largest posterior reward mean instead that with the largest EI so that the minimum regret rate is guaranteed. This is also our second technical contribution. Here we use a decreasing function of  $t$  in the form of  $\frac{C_0}{t^\beta}$ , where  $C_0$  is chosen in the interval  $[\sqrt{d}, d]$  and  $\beta$  is chosen in the interval  $[0.5, 3]$  as we explained in the proof of Theorem 1.

## E REGRET ANALYSIS FOR NEURALEI

**The novelty in our analysis for NeuralEI** While at a high level it is true that the regret analysis for NeuralEI combines the proof techniques of LinEI and the existing NTK techniques (Zhou et al., 2020; Zhang et al., 2021), we still needed some additional proof techniques for NeuralEI. To explain further, to analyze the regret  $h(x_{a^*(t),t}) - h(x_{a(t),t})$ , the regret of LinEI is decomposed as  $x_{a^*(t),t}^T \theta^* - x_{a(t),t}^T \theta^* = (x_{a^*(t),t}^T \theta^* - r_t^+) + (r_t^+ - x_{a(t),t}^T \theta^*)$ . However, for NeuralEI, we have to consider two cases in Lemma 19 with respect to the set of saturated arms  $S_t$ . If  $S_t = \emptyset$  then the regret is simply bounded as  $h(x_{a^*(t),t}) - h(x_{a(t),t}) < (1 + c_t)\nu\sigma_{a(t),t} + 2\epsilon(m)$ . Otherwise, it is decomposed as

$$h(x_{a^*(t),t}) - h(x_{a(t),t}) = [h(x_{a^*(t),t}) - \tilde{f}_{i_0,t}] + [\tilde{f}_{i_0,t} - f_t^+] + [f_t^+ - h(x_{a(t),t})],$$

where  $\tilde{f}_{i_0,t}$  is a sample from  $\mathcal{N}(f(x_{i,t}; \theta_{t-1}), \nu^2 \sigma_{i,t}^2)$ ,  $f_t^+ = \max_{i \in [K]} \{f(x_{i,t}; \theta_{t-1})\}$  and  $i_0$  is an arm satisfying the condition  $h(x_{a^*(t),t}) - h(x_{i_0,t}) < (1 + c_t)\nu\sigma_{i_0,t} + 2\epsilon(m)$ . Then we go on to upper bound each term independently.

Now we start to prove Theorem 2. Similar to the work of Zhang et al. (2021), to guarantee our convergence analysis, the following condition on the neural network width is required.

$$m \geq C \max\{\sqrt{\lambda} L^{-3/2} [\log(TKL/\delta)]^{3/2}, T^6 K^6 L^6 \log(TKL/\delta) \max\{\lambda_0^{-4}, 1\}\}$$

and

$$m[\log(m)]^{-3} \geq CTL^{12}\lambda^{-1} + CT^7\lambda^{-8}L^{18}(\lambda + LT)^6 + CL^{21}T^7\lambda^{-7}(1 + \sqrt{T/\lambda})^6, \text{ where } C \text{ is a positive absolute constant.}$$

We define filtration  $\mathcal{F}_{t-1}$  as the union of history until time  $t-1$ , and the contexts at time  $t$ . For any  $t$ , we define an event  $\mathcal{E}_t^\sigma$  as follows:

$$\mathcal{E}_t^\sigma = \{\omega \in \mathcal{F}_t : \forall i \in [K], |\tilde{f}_{i,t} - f(x_{i,t}; \theta_{t-1})| \leq c_t \nu \sigma_{i,t}\},$$

where  $c_t = \sqrt{4\log t + 2\log K}$ .

**Lemma 11** (Lemma 4.2 of (Zhang et al., 2021)). *For any  $t \in [T]$ ,  $\mathbb{P}(\mathcal{E}_t^\sigma) \geq 1 - t^{-2}$ .*

For any  $t$ , we define an event  $\mathcal{E}_t^\mu$  as follows:

$$\mathcal{E}_t^\mu = \{\omega \in \mathcal{F}_t : \forall i \in [K], |f(x_{i,t}; \theta_{t-1}) - h(x_{t,k})| \leq \nu \sigma_{i,t} + \epsilon(m)\},$$

where  $\epsilon(m)$  is defined as in (Zhang et al., 2021).

**Lemma 12** (Lemma 4.3 of (Zhang et al., 2021)). *Set  $\eta = C(m\lambda + mLT)^{-1}$ , then we have  $\mathbb{P}(\mathcal{E}_t^\mu) \geq 1 - \delta$ .*

Besides above lemmas, we also need several results from the previous works.

### E.1 AUXILIARY LEMMAS

**Lemma 13** (Lemma B.9 of (Zhang et al., 2021)). *For any time  $t \in [T]$ ,  $i \in [K]$  and any  $\delta \in (0, 1)$ , if the network width  $m$  satisfies Condition 1, we have with probability at least  $1 - \delta$ , that  $\sigma_{i,t} \leq C_1 \sqrt{L}$ , where  $C_1$  is a positive constant.*

**Lemma 14** (Lemma 4.4 of (Zhang et al., 2021)). *For any  $t \in [T]$ ,  $i \in [K]$ , we have  $\mathbb{P}[\tilde{r}_{i,t} + \epsilon(m) > h(x_{i,t}) | \mathcal{F}_t] \geq (4e\sqrt{\pi})^{-1}$ .*

**Lemma 15** (Lemma 4.8 of (Zhang et al., 2021)). *Assume that the width of the neural network  $m$  satisfies*

$$m \geq C \max\{\sqrt{\lambda} L^{-3/2} [\log(TKL^2/\delta)]^{3/2}, T^6 K^6 L^6 \log(TKL/\delta) \max\{\lambda_0^{-4}, 1\}\}$$

and

$$m[\log(m)]^{-3} \geq CTL^{12}\lambda^{-1} + CT^7\lambda^{-8}L^{18}(\lambda + LT)^6 + CL^{21}T^7\lambda^{-7}(1 + \sqrt{T/\lambda})^6, \text{ where } C \text{ is a positive absolute constant.}$$

With high probability  $1 - \delta$ , for every  $i \in [K]$  we have

$$\sum_{i=1}^T \min\{\sigma_{a_t,t}, 1\} \leq \sqrt{2\lambda T(\tilde{d}\log(1 + TK) + 1)} + C2T^{13/6} \sqrt{\log mm}^{-1/6} \lambda^{-2/3} L^{9/2},$$

where  $C_1, C_2$  are absolute constants.

### E.2 PROOF FOR THEOREM 2

Similar to the case of linear bandits, before we proceed to analyze the expected cumulative regret of the NeuralEI, we need the following lemma to lower bound and upper bound the expected improvement for neural contextual bandits.

**Lemma 16.** *Assume that the event  $\mathcal{E}_t^\sigma$  holds. Set  $I_{i,t} = \max\{0, \tilde{f}_{i,t} - f_t^+\}$ . Then for every  $i \in [K]$ , we have*

$$I_{i,t} - c_t \nu \sigma_{i,t} \leq \alpha_{i,t}^{EI} \leq I_{i,t} + \nu(c_t + 1) \sigma_{i,t}.$$

*Proof.* If  $\sigma_{i,t} = 0$  then  $\alpha_{i,t}^{EI} = I_{i,t}$ , which makes the result trivial. We now assume that  $\sigma_{i,t} > 0$ . Set  $q = \frac{\tilde{f}_{i,t} - f_t^+}{\sigma_{i,t}}$  and  $u = \frac{f(x_{i,t}; \theta_{t-1}) - f_t^+}{\sigma_{i,t}}$ . Set  $\tau(z) = z\Phi(z) + \phi(z)$ . Then we have that

$$\alpha_{i,t}^{EI} = \nu \sigma_{i,t} \tau\left(\frac{u}{\nu}\right).$$

By Lemma 11, we have that  $|u - q| \leq c_t \nu$  with probability  $1 - t^{-2}$ . As  $\tau'(z) = \Phi(z) \in [0, 1]$ ,  $\tau$  is non-decreasing and  $\tau(z) \leq 1 + z$  for  $z > 0$ . Hence,

$$\begin{aligned} \alpha_{i,t}^{EI} &\leq \nu \sigma_{i,t} \tau\left(\frac{\max\{0, q\} + c_t \nu}{\nu}\right) \\ &\leq \nu \sigma_{i,t} \left(\frac{\max\{0, q\} + c_t \nu}{\nu} + 1\right) \\ &= I_{i,t} + (c_t \nu + \nu) \sigma_{i,t} \end{aligned}$$

If  $I_{i,t} = 0$  then the lower bound is trivial as  $\alpha_{i,t}^{EI}$  is non-negative. Thus suppose  $I_{i,t} > 0$ . Since  $\alpha_{i,t}^{EI} \geq 0$  and  $\tau(z) \geq 0$  for all  $z$ , and  $\tau(z) = z + \tau(-z) \geq z$ . Therefore,

$$\begin{aligned} \alpha_{i,t}^{EI} &\geq \nu \sigma_{i,t} \tau\left(\frac{q - c_t \nu}{\nu}\right) \\ &\geq \nu \sigma_{i,t} \left(\frac{q - c_t \nu}{\nu}\right) \\ &= I_{i,t} - c_t \nu \sigma_{i,t} \end{aligned}$$

□

Now we proceed to analyze the regret. Following the algorithm, we consider two cases of  $a(t)$ .

E.2.1 CONSIDERING THE CASE  $a(t) = \bar{a}(t)$ 

**Lemma 17.** Assume that the event  $\mathcal{E}_t^\sigma$  holds. Then for every  $i \in [K]$ , we have

$$\tilde{f}_{i,t} - f_t^+ \leq \frac{\tau(c_t)}{\tau(-c_t)}(2c_t + 1)\nu\sigma_{a(t),t}.$$

*Proof.* If  $\sigma_{i,t} = 0$  then by definition of  $\alpha_{i,t}^{EI}$ , we have  $\alpha_{i,t}^{EI} = I_{i,t}$ . We have

$$\begin{aligned} I_{i,t} &= \alpha_{i,t}^{EI} \\ &\leq \alpha_{a(t),t}^{EI} \\ &\leq I_{a(t),t} + \nu(c_t + 1)\sigma_{a(t),t}, \end{aligned}$$

where in the first inequality, we use the definition  $\alpha_{a(t),t}^{EI} = \max_{i \in [K]} \alpha_{i,t}^{EI}$ . In the second inequality, we use Lemma 1. Thus, the lemma holds with probability  $1 - t^{-2}$ .

We now consider  $\sigma_{i,t} > 0$ . If  $\tilde{f}_{i,t} < f_t^+$  then the lemma will be trivial. We now consider  $\tilde{f}_{i,t} > f_t^+$ . Following the derivation of the acquisition function  $\alpha^{EI}$ , we have  $\alpha_{i,t}^{EI} = \nu\sigma_{i,t}\tau\left(\frac{f(x_{i,t};\theta_{t-1}) - f_t^+}{\nu\sigma_{i,t}}\right)$ . Further, we also have  $\frac{f(x_{i,t};\theta_{t-1}) - f_t^+}{\nu\sigma_{i,t}} \geq \frac{-c_t\nu}{\nu}$ . It is because  $f(x_{i,t};\theta_{t-1}) - h(x_{i,t}) \geq -c_t\nu\sigma_{i,t}$  and we are considering the case when  $\tilde{f}_{i,t} > f_t^+$ . Therefore,  $\alpha_{i,t}^{EI} \geq \nu\tau(-c_t)\sigma_{i,t}$ .

Now, we combine the fact that  $\alpha_{i,t}^{EI} \geq \nu\tau(-c_t)\sigma_{i,t}$  with the fact that  $\alpha_{i,t}^{EI} \geq I_{i,t} - c_t\nu\sigma_{i,t}$  which is proven in Lemma 16 to obtain the following inequality:

$$I_{i,t} \leq \frac{\tau(c_t)}{\tau(-c_t)}\alpha_{i,t}^{EI} \quad (8)$$

This inequality Eq(8) holds. Finally, we achieve

$$\begin{aligned} x_{i,t}^T \theta^* - r_t^+ &\leq I_{i,t} \\ &\leq \frac{\tau(c_t)}{\tau(-c_t)}\alpha_{i,t}^{EI} \\ &\leq \frac{\tau(c_t)}{\tau(-c_t)}\alpha_{a(t),t}^{EI} \\ &\leq \frac{\tau(c_t)}{\tau(-c_t)}(\max\{0, \tilde{f}_{a(t),t} - f_t^+\} + \nu(c_t + 1)\sigma_{a(t),t}) \\ &\leq \frac{\tau(c_t)}{\tau(-c_t)}(\max\{0, f(x_{a(t),t};\theta_{t-1}) + c_t\nu\sigma_{a(t),t} - f_t^+\} + \nu(c_t + 1)\sigma_{a(t),t}) \\ &\leq \frac{\tau(c_t)}{\tau(-c_t)}(\max\{0, c_t\nu\sigma_{a(t),t}\} + \nu(c_t + 1)\sigma_{a(t),t}) \\ &= \frac{\tau(c_t)}{\tau(-c_t)}(2c_t\nu + \nu)\sigma_{a(t),t} \end{aligned}$$

where the first inequality holds by the definition of the function  $I_t$ . The second one comes from Eq(8). The third one holds by the property of the chosen point  $a(t) = \operatorname{argmax}_{i \in [K]} \alpha_{i,t}^{EI}$ . The final inequality hold due to Lemma 16.  $\square$

**Lemma 18.** Assume that the event  $\mathcal{E}_t^\mu$  holds. Pick a  $\delta \in (0, 1)$ . Then with probability  $1 - \delta$  we have

$$f_t^+ - h(x_{a(t),t}) \leq (\sqrt{2\log(C_1 C_0^{-1} \sqrt{L} \nu t^\beta)} + 1)\nu\sigma_{a(t),t} + \epsilon(m).$$

*Proof.* We have

$$\begin{aligned}
\alpha_{a(t),t}^{EI} &= (f(x_{a(t),t}; \theta_{t-1}) - f_t^+) \Phi\left(\frac{f(x_{a(t),t}; \theta_{t-1}) - f_t^+}{\nu\sigma_{a(t),t}}\right) + \nu\sigma_{a(t),t} \phi\left(\frac{f(x_{a(t),t}; \theta_{t-1}) - f_t^+}{\nu\sigma_{a(t),t}}\right) \\
&\leq \nu\sigma_{a(t),t} \phi\left(\frac{f(x_{a(t),t}; \theta_{t-1}) - f_t^+}{\nu\sigma_{a(t),t}}\right) \\
&= \nu\sigma_{a(t),t} \frac{1}{2\sqrt{\pi}} \exp\left(-\frac{1}{2}\left(\frac{f(x_{a(t),t}; \theta_{t-1}) - f_t^+}{\nu\sigma_{a(t),t}}\right)^2\right)
\end{aligned}$$

where the first inequality holds due to the definition of action  $a(t)$ . The second equality holds due to the definition of  $\alpha_{a(t),t}^{EI}$ . The second inequality comes from the fact that  $f(x_{a(t),t}; \theta_{t-1}) \leq f_t^+$ . The third equality holds due to the definition of function  $\phi(\cdot)$ .

From the last inequality, we obtain

$$|f(x_{a(t),t}; \theta_{t-1}) - f_t^+| \leq \sqrt{2\log\left(\frac{\nu\sigma_{a(t),t}}{\alpha_{a(t),t}^{EI}}\right)} \nu\sigma_{a(t),t}.$$

By using the condition that  $\alpha_{a(t),t}^{EI} \geq \frac{C_0}{t^\beta}$  and the fact that  $\sigma_{a(t),t} \leq C_1\sqrt{L}$  with probability  $1 - \delta$ , we have

$$|f(x_{a(t),t}; \theta_{t-1}) - f_t^+| \leq \sqrt{2\log(C_1 C_0^{-1} \sqrt{L} \nu t^\beta)} \nu\sigma_{a(t),t} \quad (9)$$

with probability  $1 - \delta$ .

Finally, with probability  $1 - \delta$ , we have

$$\begin{aligned}
f_t^+ - h(x_{a(t),t}) &= f_t^+ - f(x_{a(t),t}; \theta_{t-1}) + f(x_{a(t),t}; \theta_{t-1}) - h(x_{a(t),t}) \\
&\leq \sqrt{2\log(C_1 C_0^{-1} \sqrt{L} \nu t^\beta)} \nu\sigma_{a(t),t} + \nu\sigma_{a(t),t} + \epsilon(m) \\
&= (\sqrt{2\log(C_1 C_0^{-1} \sqrt{L} \nu t^\beta)} + 1) \nu\sigma_{a(t),t} + \epsilon(m),
\end{aligned}$$

where in the first inequality, we use the inequality Eq(9) and Lemma 12  $\square$

For any  $t$  we define an event  $\mathcal{E}_t^\sigma$  such that  $\forall i \in [K] : |\tilde{f}_{i,t} - f(x_{i,t}; \theta_{t-1})| \leq c_t \nu\sigma_{i,t}$ , where  $c_t =$ .

We define the set of saturated arms  $S_t$  as follows:

$$S_t = \{i | i \in [K], h(x_{a^*(t),t}) - h(x_{i,t}) \geq (1 + c_t) \nu\sigma_{i,t} + 2\epsilon(m)\}.$$

**Lemma 19.** We assume that both  $\mathcal{E}_t^\sigma$  and  $\mathcal{E}_t^\mu$  hold. Then,

- if  $S_t = \emptyset$  then we have that

$$h(x_{a^*(t),t}) - h(x_{a(t),t}) < (1 + c_t) \nu\sigma_{a(t),t} + 2\epsilon(m)$$

- if  $S_t \neq \emptyset$  then with probability  $1 - \delta$ , we have that

$$h(x_{a^*(t),t}) - h(x_{a(t),t}) \leq \frac{\tau(c_t)}{\tau(-c_t)} \nu(2c_t + 1) \sigma_{a(t),t} + (\sqrt{2\log(C_1 C_0^{-1} \sqrt{L} \nu t^\beta)} + 1) \nu\sigma_{a(t),t} + 2\epsilon(m)$$

*Proof.* There are two cases:

- If  $S_t = \emptyset$  then every  $i \in [K]$ , we always have  $h(x_{a^*(t),t}) - h(x_{i,t}) < (1 + c_t) \nu\sigma_{i,t} + 2\epsilon(m)$ . Thus, by choosing  $i = a(t)$  which is the arm chosen by the NeuralEI algorithm, we get that  $h(x_{a^*(t),t}) - h(x_{a(t),t}) < (1 + c_t) \nu\sigma_{a(t),t} + 2\epsilon(m)$ .



- If  $S_t \neq \emptyset$ , then there exists an arm  $i_0$  such that

$$h(x_{a^*(t),t}) - h(x_{i_0,t}) < (1 + c_t)\nu\sigma_{i_0,t} + 2\epsilon(m) \quad (10)$$

On the other hand, we have that  $|h(x_{i_0,t}) - \tilde{f}_{i_0,t}| \leq |h(x_{i_0,t}) - f(x_{i_0,t}; \theta_t)| + |f(x_{i_0,t}; \theta_t) - \tilde{f}_{i_0,t}| \leq \epsilon(m) + (1 + c_t)\nu\sigma_{i_0,t}$

Hence, combining with Eq(10), we have that  $h(x_{a^*(t),t}) - \tilde{f}_{i_0,t} \geq h(x_{a^*(t),t}) - h(x_{i_0,t}) + |h(x_{i_0,t}) - \tilde{f}_{i_0,t}| \geq \epsilon(m)$

Combining this result with Lemma 17 and 18, with probability  $1 - \delta$ , we have

$$\begin{aligned} h(x_{a^*(t),t}) - h(x_{a(t),t}) &= [h(x_{a^*(t),t}) - \tilde{f}_{i_0,t}] + [\tilde{f}_{i_0,t} - f_t^+] + [f_t^+ - h(x_{a(t),t})] \\ &\leq \epsilon(m) + \frac{\tau(c_t)}{\tau(-c_t)}\nu(2c_t + 1)\sigma_{a(t),t} + \\ &\quad + (\sqrt{2\log(C_1 C_0^{-1} \sqrt{L} \nu t^\beta)} + 1)\nu\sigma_{a(t),t} + \epsilon(m) \\ &= \frac{\tau(c_t)}{\tau(-c_t)}\nu(2c_t + 1)\sigma_{a(t),t} + (\sqrt{2\log(C_1 C_0^{-1} \sqrt{L} \nu t^\beta)} + 1)\nu\sigma_{a(t),t} + \\ &\quad + 2\epsilon(m) \end{aligned}$$

We note that in the above inequality, we apply Lemma 17 for the arm  $i_0$ .

□

### E.2.2 CONSIDERING THE CASE $a(t) = \text{ARGMAX}_{i \in [K]} \{f(x_{i,t}; \theta_{t-1})\}$

**Lemma 20.** *We assume that both  $\mathcal{E}_t^\sigma$  holds. Then for  $i \in [K]$  we have*

$$\tilde{f}_{i,t} - f_t^+ \leq \frac{\tau(c_t)}{\tau(-c_t)} \frac{C_0}{t^\beta}.$$

**Lemma 21.** *We assume that  $\mathcal{E}_t^\mu$  holds. Then we have*

$$f_t^+ - h(x_{a(t),t}) \leq \nu\sigma_{a(t),t}.$$

*Proof.* By definition,  $a(t) = \text{argmax}_{i \in [K]} \{f(x_{i,t}; \theta_{t-1})\}$ . Hence  $f_t^+ = f(x_{a(t),t}; \theta_{t-1})$ . By Lemma 11, we have  $f_t^+ - h(x_{a(t),t}) = f(x_{a(t),t}; \theta_{t-1}) - h(x_{a(t),t}) \leq \nu\sigma_{a(t),t} + \epsilon(m)$ . The lemma holds. □

**Lemma 22.** *We assume that both  $\mathcal{E}_t^\sigma$  and  $\mathcal{E}_t^\mu$  hold. Then,*

- if  $S_t = \emptyset$  then we have that

$$h(x_{a^*(t),t}) - h(x_{a(t),t}) < (1 + c_t)\nu\sigma_{a(t),t} + 2\epsilon(m)$$

,

- if  $S_t \neq \emptyset$  then we have that

$$h(x_{a^*(t),t}) - h(x_{a(t),t}) \leq \frac{\tau(c_t)}{\tau(-c_t)} \frac{C_0}{t^\beta} + \nu\sigma_{a(t),t} + \epsilon(m)$$

.

*Proof.* There are two cases:

- If  $S_t = \emptyset$  then every  $i \in [K]$ , we always have  $h(x_{a^*(t),t}) - h(x_{i,t}) < (1 + c_t)\nu\sigma_{i,t} + 2\epsilon(m)$ . Thus, by choosing  $i = a(t)$  which is the arm chosen by the NeuralEI algorithm, we get that  $h(x_{a^*(t),t}) - h(x_{a(t),t}) < (1 + c_t)\nu\sigma_{a(t),t} + 2\epsilon(m)$ .

- $S_t \neq \emptyset$ . Similar to Lemma 21, there exists an arm  $i_0$  such that  $h(x_{a^*(t),t}) - \tilde{f}_{i_0,t} \geq \epsilon(m)$ . Combining this result with Lemma 20 and 21 we have

$$\begin{aligned} h(x_{a^*(t),t}) - h(x_{a(t),t}) &= [h(x_{a^*(t),t}) - \tilde{f}_{i_0,t}] + [\tilde{f}_{i_0,t} - f_t^+] + [f_t^+ - h(x_{a(t),t})] \\ &\leq \epsilon(m) + \frac{\tau(c_t)}{\tau(-c_t)} \frac{C_0}{t^\beta} + \nu \sigma_{a(t),t} \end{aligned}$$

We note that in the above inequality, we apply Lemma 17 for the arm  $i_0$ .

□

**Lemma 23.** We assume that both  $\mathcal{E}_t^\sigma$  and  $\mathcal{E}_t^\mu$  hold. Then with probability  $1 - \delta$ , we have

$$h(x_{a^*(t),t}) - h(x_{a(t),t}) \leq \left( \frac{\tau(c_t)}{\tau(-c_t)} (2c_t + 1) + (\sqrt{2\log(C_1 C_0^{-1} \sqrt{L} \nu t^\beta)} + 1) \nu \sigma_{a(t),t} + \frac{\tau(c_t)}{\tau(-c_t)} \frac{C_0}{t^\beta} + 2\epsilon(m) \right).$$

**Lemma 24.** With probability  $1 - \delta$ , we have

$$\begin{aligned} \mathbb{E}[r_t | \mathcal{F}_t, \mathcal{E}_t^\mu] &\leq \left( \frac{\tau(c_t)}{\tau(-c_t)} (2c_t + 1) + (\sqrt{2\log(C_1 C_0^{-1} \sqrt{L} \nu t^\beta)} + 1) C_1 \sqrt{L} \right) \nu \mathbb{E}[\min\{\sigma_{a(t),t}, 1\} | \mathcal{F}_t, \mathcal{E}_t^\mu] \\ &\quad + \frac{\tau(c_t)}{\tau(-c_t)} \frac{C_0}{t^\beta} + 2\epsilon(m) + \frac{2}{t^2} \end{aligned}$$

*Proof.* Set  $r_t = h(x_{a^*(t),t}) - h(x_{a(t),t})$ , we have

$$\begin{aligned} \mathbb{E}[r_t | \mathcal{F}_t, \mathcal{E}_t^\mu] &= \mathbb{E}[h(x_{a^*(t),t}) - h(x_{a(t),t}) | \mathcal{F}_t, \mathcal{E}_t^\mu, \mathcal{E}_t^\sigma] \mathbb{P}(\mathcal{E}_t^\sigma) + \\ &\quad + \mathbb{E}[h(x_{a^*(t),t}) - h(x_{a(t),t}) | \mathcal{F}_t, \mathcal{E}_t^\mu, \bar{\mathcal{E}}_t^\sigma] \mathbb{P}(\bar{\mathcal{E}}_t^\sigma) \\ &\leq \left( \frac{\tau(c_t)}{\tau(-c_t)} \nu (2c_t + 1) + (\sqrt{2\log(C_1 C_0^{-1} \sqrt{L} \nu t^\beta)} + 1) \nu \right) \mathbb{E}[\sigma_{a(t),t} | \mathcal{F}_t, \mathcal{E}_t^\mu] + \\ &\quad + 2\epsilon(m) + \frac{2}{t^2}, \end{aligned}$$

where the first term is bounded by Lemma 22 and the second term is bounded due to the facts that  $h(x_{a^*(t),t}) - h(x_{a(t),t}) \leq |h(x_{a^*(t),t})| + |h(x_{a(t),t})| \leq 2$  and  $\mathbb{P}(\bar{\mathcal{E}}_t^\sigma) \leq \frac{1}{t^2}$ .

Further, due to  $|h(x)| \leq 1$ , we obtain an upper bound for  $\mathbb{E}[r_t | \mathcal{F}_t, \mathcal{E}_t^\mu]$  as

$$\begin{aligned} \mathbb{E}[r_t | \mathcal{F}_t, \mathcal{E}_t^\mu] &\leq \min\left\{ \left( \frac{\tau(c_t)}{\tau(-c_t)} \nu (2c_t + 1) + (\sqrt{2\log(C_1 C_0^{-1} \sqrt{L} \nu t^\beta)} + 1) \nu \right) \mathbb{E}[\sigma_{a(t),t} | \mathcal{F}_t, \mathcal{E}_t^\mu], 2 \right\} \\ &\quad + 2\epsilon(m) + \frac{2}{t^2} \end{aligned}$$

On the other hand, we have  $\nu \geq 1$  by definition,  $2c_t + 1 = 2\sqrt{4\log t} + 2\log K + 1 \geq 2$  with  $t \geq 2$ .

$\frac{\tau(c_t)}{\tau(-c_t)} \geq \frac{\tau(0)}{\tau(0)} = 1$ . Hence,

$$\begin{aligned} \mathbb{E}[r_t | \mathcal{F}_t, \mathcal{E}_t^\mu] &\leq \left( \frac{\tau(c_t)}{\tau(-c_t)} \nu (2c_t + 1) + (\sqrt{2\log(C_1 C_0^{-1} \sqrt{L} \nu t^\beta)} + 1) \nu \right) \min\{\mathbb{E}[\sigma_{a(t),t} | \mathcal{F}_t, \mathcal{E}_t^\mu], 1\} \\ &\quad + 2\epsilon(m) + \frac{2}{t^2} \\ &\leq \left( \frac{\tau(c_t)}{\tau(-c_t)} \nu (2c_t + 1) + (\sqrt{2\log(C_1 C_0^{-1} \sqrt{L} \nu t^\beta)} + 1) \nu C_1 \sqrt{L} \right) \mathbb{E}[\min\{\sigma_{a(t),t}, 1\} | \mathcal{F}_t, \mathcal{E}_t^\mu] \\ &\quad + 2\epsilon(m) + \frac{2}{t^2}, \end{aligned}$$

where we use Lemma 13 with probability  $1 - \delta$ .

□

**Theorem 4.** If the network width  $m$  satisfies:

$$m \geq \text{poly}(\gamma, T, K, L, \log(1/\delta)),$$

then with probability at least  $1 - \delta$ , the regret of Algorithm 2 is bounded as

$$R_T \leq C_2(1 + c_T) \nu \sqrt{2\lambda L (\tilde{d} \log(1 + TK) + 1) T} + (4 + C_3(1 + c_T) \nu L) \sqrt{2\log(3/\delta) T} + 5.$$

*Proof.* By Lemma 12, the event  $\mathcal{E}_t^\mu$  holds for all  $1 \leq t \leq T$  with probability at least  $1 - \delta$ . Hence, with probability  $1 - \delta$  we have

$$\begin{aligned}
\bar{R}(T) &= \sum_{i=1}^T h(x_{a^*(t),t}) - h(x_{a(t),t}) \mathbf{1}(\mathcal{E}_t^\mu) \\
&\leq (C_3(2c_T + 1) + (\sqrt{2\log(C_1 C_0^{-1} \sqrt{L} \nu T^\beta)} + 1) C_1 \sqrt{L}) \nu \sum_{i=1}^T \mathbb{E}[\min\{\sigma_{a(t),t}, 1\} | \mathcal{F}_t, \mathcal{E}_t^\mu] \\
&\quad + C_3 C_0 \sum_{i=1}^T \frac{1}{t^\beta} + 2\epsilon(m)T + \frac{\pi^2}{3} \\
&\leq MN + C_3 C_0 \sum_{i=1}^T \frac{1}{t^\beta} + 2\epsilon(m)T + \frac{\pi^2}{3},
\end{aligned}$$

where we set  $M = (C_3(2c_T + 1) + (\sqrt{2\log(C_1 C_0^{-1} \sqrt{L} \nu T^\beta)} + 1) C_1 \sqrt{L}) \nu$  and  $N = (\sqrt{2\lambda T(\tilde{d}\log(1 + TK) + 1)} + C_2 T^{13/6} \sqrt{\log m} m^{-1/6} \lambda^{-2/3} L^{9/2})$ .

With  $\beta \geq 2$ ,  $\sum_{i=1}^T \frac{1}{t^\beta} < \frac{\pi^2}{6}$ . We choose  $C_0 \in [\sqrt{\tilde{d}}, \tilde{d}]$  to eliminate the term  $\tilde{d}$  in  $\sqrt{2\log(C_1 C_0^{-1} \sqrt{L} \nu T^\beta)}$ .

By choosing  $m$  similar as in (Zhang et al., 2021) such that  $C_3(2c_T + 1) C_2 T^{13/6} \sqrt{\log m} m^{-1/6} \lambda^{-2/3} L^5 \leq \frac{1}{3}$ ,  $2\epsilon(m)T \leq \frac{1}{3}$  and taking union bound over Lemmas 12, 24, we obtain

$$\bar{R}(T) \leq \mathcal{O}(\tilde{d} \sqrt{\beta \log(1 + TK) \log(T) T})$$

□
